# Supplementary material for: Synthesis, biological evaluation and computational studies of pyrazole derivatives as Mycobacterium tuberculosis CYP121A1 inhibitors
Source: PubMed Central journal article supplement (PMC9667784; doi:10.1039/d2md00155a), 2022-08-16
Supplement: MD-013-D2MD00155A-s001.pdf [file MD-013-D2MD00155A-s001.pdf]

## SUPPORTING INFORMATION

### Synthesis, biological evaluation and computational studies of pyrazole derivatives as *Mycobacterium tuberculosis* CYP121A1 inhibitors

Lama A. Alshabani,<sup>a</sup> Amit Kumar,<sup>b</sup> Sam J. Willcocks,<sup>c,d</sup> Gayathri Srithiran,<sup>d</sup> Sanjib Bhakta,<sup>d</sup> D. Fernando Estrada<sup>b</sup> and Claire Simons<sup>\*a</sup>

#### Contents

|                                                                                                                                                                                 |               |
|---------------------------------------------------------------------------------------------------------------------------------------------------------------------------------|---------------|
| Chemical synthesis and analysis of hydrazines <b>7</b>                                                                                                                          | <b>S2</b>     |
| Chemical synthesis and analysis of aldehydes <b>8</b>                                                                                                                           | <b>S2-S4</b>  |
| Chemical synthesis and analysis of alcohols <b>9</b>                                                                                                                            | <b>S4-S5</b>  |
| Chemical synthesis and analysis of chlorides <b>10</b>                                                                                                                          | <b>S5-S6</b>  |
| HPLC-MS for triazole derivative <b>12h</b>                                                                                                                                      | <b>S7</b>     |
| NMR ( <sup>1</sup> H, <sup>13</sup> C and <sup>19</sup> F) for compounds <b>11</b> and <b>12</b>                                                                                | <b>S8-S27</b> |
| <b>Figure S1.</b> Binding difference spectra of pyrazole derivatives <b>11a</b> , <b>11c-11h</b> and <b>12b</b>                                                                 | <b>S28</b>    |
| <b>Figure S2.</b> <sup>19</sup> F NMR spectra of BTFA-labelled CYP121_S171C (blue) alone, with cYY bound (red) and with exemplar pyrazole ligands (green)                       | <b>S28</b>    |
| <b>Figure S3.</b> Ligand-protein complex stability through protein-ligand RMSD over 150 ns MD simulation for compounds <b>11</b> . Ligand RMSD in red and protein RMSD in blue. | <b>S29</b>    |
| <b>Figure S4.</b> Ligand-protein complex stability through protein-ligand RMSD over 150 ns MD simulation for compounds <b>12</b> . Ligand RMSD in red and protein RMSD in blue. | <b>S30</b>    |

**General method for the synthesis of hydrazine derivatives (7).** To a solution of phenylhydrazine hydrochloride (**5** or **6**) (1-2 equiv.) in dry EtOH (1 mL/mmol) was added Et<sub>3</sub>N (2 equiv.) and the reaction stirred at room temperature for 30 min. A solution of acetophenone (**1-4**) (1 equiv.) in dry EtOH (1 mL/mmol) and acetic acid (0.2 mL/mmol) was then added to the reaction, which was heated at 83 °C for 1 h. The solvent was then evaporated under reduced pressure and ice-H<sub>2</sub>O added to the remaining residue. The resulting precipitate was collected by filtration, dried, and used in the next reaction without further purification.

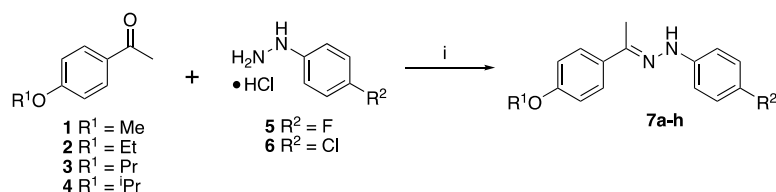

(*E*)-1-(4-Fluorophenyl)-2-(1-(4-methoxyphenyl)ethylidene)hydrazine (**7a**, R<sup>1</sup>=CH<sub>3</sub>, R<sup>2</sup>=F). Prepared from 4-methoxyacetophenone (**1**) (0.32 g, 2.15 mmol) and 4-fluorophenylhydrazine hydrochloride (**5**) (0.7 g, 4.30 mmol). Yield 0.55 g (100%) as an orange solid. m.p: 90 - 92° C, R<sub>f</sub>: 0.80 (petroleum ether - EtOAc 1:2 v/v). <sup>1</sup>H NMR (DMSO-d<sub>6</sub>): 9.12 (s, 1H, NH), 7.72 (d, *J* = 9.0 Hz, 2H, Ar), 7.20 (m, 2H, Ar), 7.05 (m, 2H, Ar), 6.94 (d, *J* = 9.0 Hz, 2H, Ar), 3.78 (s, 3H, OCH<sub>3</sub>), 2.22 (s, 3H, CH<sub>3</sub>). <sup>19</sup>F NMR: (DMSO-d<sub>6</sub>): δ -126.54 (F - Ar)

(*E*)-1-(4-Chlorophenyl)-2-(1-(4-methoxyphenyl)ethylidene)hydrazine (**7b**, R<sup>1</sup>=CH<sub>3</sub>, R<sup>2</sup>=Cl). Prepared from 4-methoxyacetophenone (**1**) (0.75 g, 5 mmol) and 4-chlorophenylhydrazine hydrochloride (**6**) (1.8 g, 10 mmol). Yield 1.374 g (100%) as an orange solid. m.p: 112 - 114° C (lit. mp<sup>1</sup> 128 - 130° C), R<sub>f</sub>: 0.89 (petroleum ether-EtOAc 1:2 v/v). <sup>1</sup>H NMR (DMSO-d<sub>6</sub>): 9.27 (s, 1H, NH), 7.73 (d, *J* = 9.0 Hz, 2H, Ar), 7.22 (m, 4H, Ar), 6.95 (d, *J* = 9.0 Hz, 2H, Ar), 3.07 (s, 3H, OCH<sub>3</sub>), 2.23 (s, 3H, CH<sub>3</sub>).

(*E*)-1-(1-(4-Ethoxyphenyl)ethylidene)-2-(4-fluorophenyl)hydrazine (**7c**, R<sup>1</sup>=CH<sub>2</sub>CH<sub>3</sub>, R<sup>2</sup>=F). Prepared from 4-ethoxyacetophenone (**2**) (2.46 g, 15 mmol) and 4-fluorophenylhydrazine hydrochloride (**5**) (2.44 g, 15 mmol). Yield 3.85 g (94%) as a pale yellow solid. m.p: 76 - 78° C, R<sub>f</sub>: 0.53 (petroleum ether - EtOAc 4:1 v/v). <sup>1</sup>H NMR (DMSO-d<sub>6</sub>): δ 9.11 (s, 1H, NH), 7.70 (d, *J* = 8.9 Hz, 2H, Ar), 7.20 (m, 2H, Ar), 7.04 (m, 2H, Ar), 6.92 (d, *J* = 8.9 Hz, 2H, Ar), 4.05 (q, *J* = 7.0 Hz, 2H, CH<sub>2</sub>CH<sub>3</sub>), 2.21 (s, 3H, CH<sub>3</sub>), 1.34 (t, *J* = 7.0 Hz, 3H, CH<sub>2</sub>CH<sub>3</sub>). <sup>19</sup>F NMR: (DMSO-d<sub>6</sub>): δ -116.52 (F - Ar)

(*E*)-1-(4-Chlorophenyl)-2-(1-(4-ethoxyphenyl)ethylidene)hydrazine (**7d**, R<sup>1</sup>=CH<sub>2</sub>CH<sub>3</sub>, R<sup>2</sup>=Cl). Prepared from 4-ethoxyacetophenone (**2**) (0.821 g, 5 mmol) and 4-chlorophenylhydrazine hydrochloride (**6**) (0.895 g, 5 mmol). Yield 1.134 g (79%) as light brown solid. m.p: 133 - 136° C, R<sub>f</sub>: 0.47 (petroleum ether - EtOAc 4:1 v/v). <sup>1</sup>H NMR (DMSO-d<sub>6</sub>): 9.26 (s, 1H, NH), 7.71 (d, *J* = 8.9 Hz, 2H, Ar), 7.22 (m, 4H, Ar), 6.93 (d, *J* = 8.9 Hz, 2H, Ar), 4.05 (q, *J* = 7.0 Hz, 2H, CH<sub>2</sub>CH<sub>3</sub>), 2.22 (s, 3H, CH<sub>3</sub>), 1.34 (t, *J* = 7.0 Hz, 3H, CH<sub>2</sub>CH<sub>3</sub>).

(*E*)-1-(4-Fluorophenyl)-2-(1-(4-propoxyphenyl)ethylidene)hydrazine (**7e**, R<sup>1</sup>=CH<sub>2</sub>CH<sub>2</sub>CH<sub>3</sub>, R<sup>2</sup>=F). Variation to method – stirred at room temperature. Prepared from 4-propoxyacetophenone (**3**) (0.8 g, 4.5 mmol) and 4-fluorophenylhydrazine hydrochloride (**5**) (1.46 g, 9 mmol). Yield 1.28 g (100%) as an orange semisolid. R<sub>f</sub>: 0.90 (petroleum ether - EtOAc 2:1 v/v). <sup>1</sup>H NMR (DMSO-d<sub>6</sub>): δ 9.11 (s, 1H, NH), 7.71 (d, *J* = 9.0 Hz, 2H, Ar), 7.19 (m, 2H, Ar), 7.05 (t, *J* = 9.0 Hz, 2H, Ar), 6.94 (d, *J* = 9.0 Hz, 2H, Ar), 3.94 (t, *J* = 7.0 Hz, 2H, OCH<sub>2</sub>), 2.21 (s, 3H, CH<sub>3</sub>), 1.75 (m, 2H, CH<sub>3</sub>CH<sub>2</sub>), 0.99 (d, *J* = 7.50 Hz, 3H, CH<sub>2</sub>CH<sub>3</sub>). <sup>19</sup>F NMR: (DMSO-d<sub>6</sub>): δ -126.56 (F-Ar)

(*E*)-1-(4-Chlorophenyl)-2-(1-(4-propoxyphenyl)ethylidene)hydrazine (**7f**, R<sup>1</sup>=CH<sub>2</sub>CH<sub>2</sub>CH<sub>3</sub>, R<sup>2</sup>=Cl). Prepared from 4-propoxyacetophenone (**3**) (0.8 g, 4.5 mmol) and 4-fluorophenylhydrazine hydrochloride (**6**) (1.60 g, 9 mmol). Yield 1.36 g (100%) as a light brown solid. m.p: 130 - 132° C, R<sub>f</sub>: 0.90 (petroleum ether - EtOAc 2:1 v/v). <sup>1</sup>H NMR (DMSO-d<sub>6</sub>): δ 9.27 (s, 1H, NH), 7.72 (d, *J* = 9.0 Hz, 2H, Ar), 7.23 (m, 4H, Ar), 6.94 (d, *J* = 8.50 Hz, 2H, Ar), 3.95 (t, *J* = 6.50 Hz, 2H, OCH<sub>2</sub>), 2.22 (s, 3H, CH<sub>3</sub>), 1.75 (m, 2H, CH<sub>3</sub>CH<sub>2</sub>), 0.99 (d, *J* = 7.50 Hz, 3H, CH<sub>2</sub>CH<sub>3</sub>).

(*E*)-1-(4-Fluorophenyl)-2-(1-(4-isopropoxyphenyl)ethylidene)hydrazine (**7g**, R<sup>1</sup>=CH(CH<sub>3</sub>)<sub>2</sub>, R<sup>2</sup>=F). Variation to method – stirred at room temperature. Prepared from 4-isopropoxyacetophenone (**4**) (0.3 g, 1.7 mmol) and 4-fluorophenylhydrazine hydrochloride (**5**) (0.54 g, 3.3 mmol). Yield 1.10 g (98%) as an orange semisolid. R<sub>f</sub>: 0.72 (petroleum ether - EtOAc 2:1 v/v). <sup>1</sup>H NMR (DMSO-d<sub>6</sub>): δ 9.11 (s, 1H, NH), 7.70 (d, *J* = 9.0 Hz, 2H, Ar), 7.19 (m, 2H, Ar), 7.04 (t, *J* = 9.0 Hz, 2H, Ar), 6.92 (d, *J* = 9.0 Hz, 2H, Ar), 4.63 (m, 1H, CH), 2.21 (s, 3H, CH<sub>3</sub>), 1.28 (d, *J* = 6.0 Hz, 6H, 2 x CH<sub>3</sub>).

(*E*)-1-(4-Chlorophenyl)-2-(1-(4-isopropoxyphenyl)ethylidene)hydrazine (**7h**, R<sup>1</sup>=CH(CH<sub>3</sub>)<sub>2</sub>, R<sup>2</sup>=Cl). Prepared from 4-isopropoxyacetophenone (**4**) (0.7 g, 3.9 mmol) and 4-chlorophenylhydrazine hydrochloride (**6**) (1.4 g, 7.8 mmol). Yield 1.18 g (100%) as a yellow solid. m.p: 84 - 86° C, R<sub>f</sub>: 0.70 (petroleum ether - EtOAc 2:1 v/v). <sup>1</sup>H NMR (DMSO-d<sub>6</sub>): δ 9.26 (s, 1H, NH), 7.71 (d, *J* = 8.9 Hz, 2H, Ar), 7.22 (m, 4H, Ar), 6.93 (d, *J* = 8.9 Hz, 2H, Ar), 4.64 (m, 1H, CH), 2.22 (s, 3H, CH<sub>3</sub>), 1.28 (d, *J* = 6.0 Hz, 6H, 2 x CH<sub>3</sub>).

**General method for the synthesis of aldehyde derivatives (8).** To a mixture of dry DMF (3 equiv.) and POCl<sub>3</sub> (3 equiv.) was cooled at 0° C for 5 min, then stirred at room temperature where a solution of hydrazine (**7**) (1 equiv.) in dry DMF (0.5

mL/mmol) was added dropwise to the Vilsmeier-Haack reagent, allowed to warm to room temperature, and then heated at 60° C for 3 h. The reaction was brought to pH 8.0 with cold saturated K<sub>2</sub>CO<sub>3</sub> solution and the precipitate collected by filtration, washed with water, dried, and used immediately in subsequent reactions without further purification.

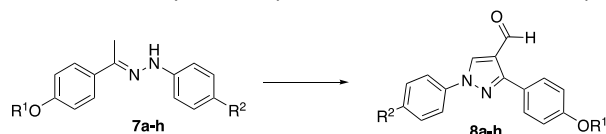

**1-(4-Fluorophenyl)-3-(4-methoxyphenyl)-1H-pyrazole-4-carbaldehyde (8a)** R<sup>1</sup>=CH<sub>3</sub>, R<sup>2</sup>=F). Prepared from (*E*)-1-(4-fluorophenyl)-2-(1-(4-methoxyphenyl)ethylidene)hydrazine (**7a**) (0.56 g, 2.17 mmol). Yield 0.61 g (95%) as an off-white solid. m.p: 144 - 146° C, R<sub>f</sub>: 0.45 (petroleum ether - EtOAc 4:1 v/v). <sup>1</sup>H NMR (DMSO-d<sub>6</sub>): δ 9.97 (s, 1H, CHO), 9.28 (s, 1H, pyrazole), 8.03 (m, 2H, Ar), 7.90 (d, *J* = 8.5 Hz, 2H, Ar), 7.43 (m, 2H, Ar), 7.07 (d, *J* = 9.0 Hz, 2H, Ar), 3.83 (s, 3H, OCH<sub>3</sub>). <sup>19</sup>F NMR: (DMSO-d<sub>6</sub>): δ -114.66 (F - Ar). <sup>13</sup>C NMR (DMSO-d<sub>6</sub>): δ 185.07 (C, aldehyde), 162.49 (C, Ar), 160.55 and 162.49 (d, <sup>1</sup>J<sub>CF</sub> = 244.0 Hz, C-F, Ar), 160.54 (C, Ar), 152.97 (C, pyrazole), 135.68 (d, <sup>4</sup>J<sub>CF</sub> = 2.5 Hz, C, Ar), 135.57 (CH, pyrazole), 130.53 (2 x CH, Ar), 124.01 (C, Ar), 122.44 (C, pyrazole), 121.84 and 121.91 (d, <sup>3</sup>J<sub>CF</sub> = 8.8 Hz, 2 x CH, Ar), 116.87 and 117.05 (d, <sup>2</sup>J<sub>CF</sub> = 22.6 Hz, 2 x CH, Ar), 114.46 (2 x CH, Ar), 55.73 (CH<sub>3</sub>).

**1-(4-Chlorophenyl)-3-(4-methoxyphenyl)-1H-pyrazole-4-carbaldehyde (8b)** R<sup>1</sup>=CH<sub>3</sub>, R<sup>2</sup>=Cl). Prepared from (*E*)-1-(4-chlorophenyl)-2-(1-(4-methoxyphenyl)ethylidene)hydrazine (**7b**) (1.3 g, 4.7 mmol). Yield 0.959 g (65%) as a buff solid. m.p: 142 - 144° C (lit. mp<sup>1</sup> 142-143<sup>1</sup>), R<sub>f</sub>: 0.52 (petroleum ether - EtOAc 4:1 v/v). <sup>1</sup>H NMR (DMSO-d<sub>6</sub>): δ 9.97 (s, 1H, CHO), 9.33 (s, 1H, pyrazole), 8.03 (d, *J* = 9.0 Hz, 2H, Ar), 7.90 (d, *J* = 9.0 Hz, 2H, Ar), 7.64 (d, *J* = 9.0 Hz, 2H, Ar), 7.07 (d, *J* = 9.0 Hz, 2H, Ar), 3.83 (s, 3H, OCH<sub>3</sub>). <sup>13</sup>C NMR (DMSO-d<sub>6</sub>): δ 185.07 (C, aldehyde), 160.60 (C-O, Ar), 153.07 (C, pyrazole), 137.92 (C, Ar), 135.68 (CH, pyrazole), 132.27 (C-Cl, Ar), 130.55 (2 x CH, Ar), 130.11 (2 x CH, Ar), 123.92 (C, pyrazole), 122.62 (C, Ar), 121.30 (2 x CH, Ar), 114.46 (2 x CH, Ar), 55.73 (CH<sub>3</sub>).

**3-(4-Ethoxyphenyl)-1-(4-fluorophenyl)-1H-pyrazole-4-carbaldehyde (8c)** R<sup>1</sup>=CH<sub>2</sub>CH<sub>3</sub>, R<sup>2</sup>=F). Prepared from (*E*)-1-(1-(4-ethoxyphenyl)ethylidene)-2-(4-fluorophenyl)hydrazine (**7c**) (3.0 g, 11 mmol). Yield 3.065 g (90%) as a white solid. m.p: 162 - 164° C, R<sub>f</sub>: 0.39 (petroleum ether - EtOAc 4:1 v/v). <sup>1</sup>H NMR (DMSO-d<sub>6</sub>): δ 9.97 (s, 1H, CHO), 9.28 (s, 1H, pyrazole), 8.03 (m, 2H, Ar), 7.89 (d, *J* = 9.0 Hz, 2H, Ar), 7.43 (m, 2H, Ar), 7.05 (d, *J* = 9.0 Hz, 2H, Ar), 4.10 (q, *J* = 7.0 Hz, 2H, CH<sub>2</sub>CH<sub>3</sub>), 1.37 (t, *J* = 7.0 Hz, 3H, CH<sub>2</sub>CH<sub>3</sub>). <sup>19</sup>F NMR: (DMSO-d<sub>6</sub>): δ -114.68 (F - Ar). <sup>13</sup>C NMR (DMSO-d<sub>6</sub>): δ 185.07 (C, aldehyde), 160.55 and 162.49 (d, <sup>1</sup>J<sub>CF</sub> = 244.0 Hz, C-F, Ar), 159.84 (C, Ar), 152.99 (C, pyrazole), 135.69 (d, <sup>4</sup>J<sub>CF</sub> = 2.5 Hz, C, Ar), 135.58 (CH, pyrazole), 130.53 (2 x CH, Ar), 123.87 (C, Ar), 122.43 (C, pyrazole), 121.83 and 121.89 (d, <sup>3</sup>J<sub>CF</sub> = 7.5 Hz, 2x CH, Ar), 116.87 and 117.05 (d, <sup>2</sup>J<sub>CF</sub> = 22.6 Hz, 2 x CH, Ar), 114.88 (2 x CH, Ar), 63.65 (CH<sub>2</sub>), 15.10 (CH<sub>3</sub>).

**1-(4-Chlorophenyl)-3-(4-ethoxyphenyl)-1H-pyrazole-4-carbaldehyde (8d)** R<sup>1</sup>=CH<sub>2</sub>CH<sub>3</sub>, R<sup>2</sup>=Cl). Prepared from (*E*)-1-(4-chlorophenyl)-2-(1-(4-ethoxyphenyl)ethylidene)hydrazine (**7d**) (0.5 g, 1.7 mmol). Yield 0.525 g (93%) as a white solid. m.p: 138 - 140° C, R<sub>f</sub>: 0.39 (petroleum ether - EtOAc 4:1 v/v). <sup>1</sup>H NMR (DMSO-d<sub>6</sub>): δ 9.97 (s, 1H, CHO), 9.32 (s, 1H, pyrazole), 8.01 (d, *J* = 9.0 Hz, 2H, Ar), 7.89 (d, *J* = 9.0 Hz, 2H, Ar), 7.64 (d, *J* = 9.0 Hz, 2H, Ar), 7.05 (d, *J* = 9.0 Hz, 2H, Ar), 4.10 (q, *J* = 7.0 Hz, 2H, CH<sub>2</sub>CH<sub>3</sub>), 1.37 (t, *J* = 7.0 Hz, 3H, CH<sub>2</sub>CH<sub>3</sub>).

**1-(4-Fluorophenyl)-3-(4-propoxyphenyl)-1H-pyrazole-4-carbaldehyde (8e)** R<sup>1</sup>=CH<sub>2</sub>CH<sub>2</sub>CH<sub>3</sub>, R<sup>2</sup>=F). Prepared from (*E*)-1-(4-fluorophenyl)-2-(1-(4-propoxyphenyl)ethylidene)hydrazine (**7e**) (1.2 g, 4.2 mmol). Yield 1.31 g (96%) as a yellow solid. m.p: 140 - 142° C, R<sub>f</sub>: 0.41 (petroleum ether - EtOAc 4:1 v/v). <sup>1</sup>H NMR (DMSO-d<sub>6</sub>): δ 9.97 (s, 1H, CHO), 9.27 (s, 1H, pyrazole), 8.04 (m, 2H, Ar), 7.90 (d, *J* = 9.0 Hz, 2H, Ar), 7.43 (t, *J* = 8.50 Hz, 2H, Ar), 7.07 (d, *J* = 9.0 Hz, 2H, Ar), 4.0 (t, *J* = 6.5 Hz, 2H, OCH<sub>2</sub>), 1.77 (m, 2H, CH<sub>3</sub>CH<sub>2</sub>), 1.01 (d, *J* = 7.50 Hz, 3H, CH<sub>3</sub>). <sup>19</sup>F NMR: (DMSO-d<sub>6</sub>): δ -114.67 (F-Ar). <sup>13</sup>C NMR (DMSO-d<sub>6</sub>): δ 185.07 (C, aldehyde), 162.49 and 160.54 (d, <sup>1</sup>J<sub>CF</sub> = 245.3 Hz, C-F, Ar), 160.0 (C, Ar), 152.99 (C, pyrazole), 135.69 (d, <sup>4</sup>J<sub>CF</sub> = 2.5 Hz, C, Ar), 135.56 (CH, pyrazole), 130.52 (2 x CH, Ar), 123.86 (C, pyrazole), 122.43 (C, Ar), 121.89 and 121.82 (d, <sup>3</sup>J<sub>CF</sub> = 8.80 Hz, 2 x CH, Ar), 117.05 and 116.86 (d, <sup>2</sup>J<sub>CF</sub> = 23.90 Hz, 2 x CH, Ar), 114.92 (2 x CH, Ar), 69.52 (OCH<sub>2</sub>), 22.48 (CH<sub>2</sub>CH<sub>3</sub>), 10.87 (CH<sub>3</sub>).

**1-(4-Chlorophenyl)-3-(4-propoxyphenyl)-1H-pyrazole-4-carbaldehyde (8f)** R<sup>1</sup>=CH<sub>2</sub>CH<sub>2</sub>CH<sub>3</sub>, R<sup>2</sup>=Cl). Prepared from (*E*)-1-(4-chlorophenyl)-2-(1-(4-propoxyphenyl)ethylidene)hydrazine (**7f**) (1.3 g, 4.3 mmol). Yield 1.47 g (100%) as a yellow solid. m.p: 132 - 134° C, R<sub>f</sub>: 0.46 (petroleum ether - EtOAc 4:1 v/v). <sup>1</sup>H NMR (DMSO-d<sub>6</sub>): δ 9.97 (s, 1H, CHO), 9.33 (s, 1H, pyrazole), 8.03 (d, *J* = 9.0 Hz, 2H, Ar), 7.90 (d, *J* = 9.0 Hz, 2H, Ar), 7.65 (d, *J* = 9.0 Hz, 2H, Ar), 7.06 (d, *J* = 9.0 Hz, 2H, Ar), 4.0 (t, *J* = 6.50 Hz, 2H, OCH<sub>2</sub>), 1.77 (m, 2H, CH<sub>3</sub>CH<sub>2</sub>), 1.0 (d, *J* = 7.50 Hz, 3H, CH<sub>3</sub>). <sup>13</sup>C NMR (DMSO-d<sub>6</sub>): δ 185.06 (C, aldehyde), 160.05 (C-O, Ar), 153.08 (C, pyrazole), 137.92 (C, Ar), 135.69 (CH, pyrazole), 132.26 (C-Cl, Ar), 130.53 (2 x CH, Ar), 130.10 (2 x CH, Ar), 123.77 (C, pyrazole), 122.61 (C, Ar), 121.29 (2 x CH, Ar), 114.92 (2 x CH, Ar), 69.53 (OCH<sub>2</sub>), 22.48 (CH<sub>2</sub>CH<sub>3</sub>), 10.86 (CH<sub>3</sub>).

**1-(4-Fluorophenyl)-3-(4-isopropoxyphenyl)-1H-pyrazole-4-carbaldehyde (8g)**, R<sup>1</sup>=CH(CH<sub>3</sub>)<sub>2</sub>, R<sup>2</sup>=F). Variation from method – reaction stirred at room temperature overnight. Prepared from (*E*)-1-(4-fluorophenyl)-2-(1-(4-isopropoxyphenyl)ethylidene)hydrazine (**7g**) (1.5 g, 5.2 mmol). Yield 1.65 g (98%) as a yellow solid. m.p: 137 - 139° C, R<sub>f</sub>: 0.40 (petroleum ether - EtOAc 4:1 v/v). <sup>1</sup>H NMR (DMSO-d<sub>6</sub>): δ 9.97 (s, 1H, CHO), 9.27 (s, 1H, pyrazole), 8.04 (m, 2H, Ar), 7.88 (d, *J*

= 9.0 Hz, 2H, Ar), 7.42 (t,  $J = 9.0$  Hz, 2H, Ar), 7.05 (d,  $J = 8.50$  Hz, 2H, Ar), 4.71 (m, 1H, CH), 1.31 (d,  $J = 6.0$  Hz, 6H, 2 x CH<sub>3</sub>). <sup>19</sup>F NMR: (DMSO-d<sub>6</sub>): δ -114.68 (F-Ar). <sup>13</sup>C NMR (DMSO-d<sub>6</sub>): δ 185.08 (C, aldehyde), 162.49 and 160.54 (d, <sup>1</sup> $J_{CF} = 245.3$  Hz, C-F, Ar), 158.81 (C, Ar), 153.01 (C, pyrazole), 135.70 (d, <sup>4</sup> $J_{CF} = 2.5$  Hz, C, Ar), 135.54 (CH, pyrazole), 130.57 (2 x CH, Ar), 123.69 (C, pyrazole), 122.42 (C, Ar), 121.88 and 121.82 (d, <sup>3</sup> $J_{CF} = 7.55$  Hz, 2 x CH, Ar), 117.05 and 116.87 (d, <sup>2</sup> $J_{CF} = 22.6$  Hz, 2 x CH, Ar), 115.91 (2 x CH, Ar), 69.73 (CH), 22.28 (2 x CH<sub>3</sub>).

**1-(4-Chlorophenyl)-3-(4-isopropoxyphenyl)-1H-pyrazole-4-carbaldehyde (8h)** (R<sup>1</sup>=CH(CH<sub>3</sub>)<sub>2</sub>, R<sup>2</sup>=Cl). Prepared from (*E*)-1-(4-chlorophenyl)-2-(1-(4-isopropoxyphenyl)ethylidene)hydrazine (**7h**) (1.18 g, 3.8 mmol). Yield 1.14 g (88%) as a yellow solid. m.p: 144 - 146° C, R<sub>f</sub>: 0.52 (petroleum ether - EtOAc 4:1 v/v). <sup>1</sup>H NMR (DMSO-d<sub>6</sub>): δ 9.97 (s, 1H, CHO), 9.32 (s, 1H, pyrazole), 8.03 (d,  $J = 9.0$  Hz, 2H, Ar), 7.89 (d,  $J = 9.0$  Hz, 2H, Ar), 7.65 (d,  $J = 9.0$  Hz, 2H, Ar), 7.05 (d,  $J = 9.0$  Hz, 2H, Ar), 4.71 (m, 1H, CH), 1.32 (d,  $J = 6.0$  Hz, 6H, 2 x CH<sub>3</sub>). <sup>13</sup>C NMR (DMSO-d<sub>6</sub>): δ 185.08 (C, aldehyde), 158.85 (C-O, Ar), 153.10 (C, pyrazole), 137.93 (C, Ar), 135.67 (CH, pyrazole), 132.26 (C-Cl, Ar), 130.58 (2 x CH, Ar), 130.11 (2 x CH, Ar), 123.59 (C, pyrazole), 122.60 (C, Ar), 121.29 (2 x CH, Ar), 115.91 (2 x CH, Ar), 69.74 (CH), 22.29 (2x CH<sub>3</sub>).

**General method for the synthesis of alcohol derivatives (9).** To an ice-cooled solution of aldehyde (**8**) (1 equiv.) in dry EtOH (3 mL/mmol) was added NaBH<sub>4</sub> (1 equiv.) in portions, and then the reaction was stirred at room temperature for 1 h. The solvent was evaporated and H<sub>2</sub>O (7 mL/mmol) was added slowly and the reaction stirred for 30 min<sup>2</sup>. The reaction mixture was extracted with EtOAc (2 x 10 mL/mmol), then the combined organic layers washed with H<sub>2</sub>O (3 x 10 mL/mmol), dried (MgSO<sub>4</sub>) and evaporated under reduced pressure to give the crude alcohol (**9**).

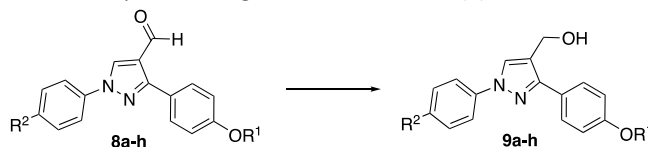

**(1-(4-Fluorophenyl)-3-(4-methoxyphenyl)-1H-pyrazol-4-yl)methanol (9a)** (R<sup>1</sup>=CH<sub>3</sub>, R<sup>2</sup>=F). Prepared from 1-(4-fluorophenyl)-3-(4-methoxyphenyl)-1H-pyrazole-4-carbaldehyde (**8a**) (0.6 g, 2 mmol). Yield 0.537 g (90%) as a light orange solid. m.p: 142 - 144° C, R<sub>f</sub>: 0.08 (petroleum ether - EtOAc 4:1 v/v). <sup>1</sup>H NMR (DMSO-d<sub>6</sub>): δ 8.45 (s, 1H, pyrazole), 7.90 (m, 2H, Ar), 7.82 (d,  $J = 9.0$  Hz, 2H, Ar), 7.35 (m, 2H, Ar), 7.02 (d,  $J = 9.0$  Hz, 2H, Ar), 5.19 (t,  $J = 5.0$  Hz, 1H, OH), 4.52 (d,  $J = 5.0$  Hz, 2H, CH<sub>2</sub>OH), 3.81 (s, 3H, OCH<sub>3</sub>). <sup>19</sup>F NMR: (DMSO-d<sub>6</sub>): δ -117.13 (F - Ar). <sup>13</sup>C NMR (DMSO-d<sub>6</sub>): δ 159.56 and 161.49 (d, <sup>1</sup> $J_{CF} = 242.7$  Hz, C-F, Ar), 159.58 (C, Ar), 150.78 (C, pyrazole), 135.67 (d, <sup>4</sup> $J_{CF} = 2.5$  Hz, C, Ar), 129.24 (CH, pyrazole), 129.11 (2 x CH, Ar), 125.88 (C, Ar), 122.02 (C, pyrazole), 120.34 and 120.41 (d, <sup>3</sup> $J_{CF} = 8.8$  Hz, 2 x CH, Ar), 116.62 and 116.80 (d, <sup>2</sup> $J_{CF} = 22.6$  Hz, 2 x CH, Ar), 114.46 (2 x CH, Ar), 55.61 (OCH<sub>3</sub>), 54.57 (CH<sub>2</sub>OH).

**(1-(4-Chlorophenyl)-3-(4-methoxyphenyl)-1H-pyrazol-4-yl)methanol (9b)** (R<sup>1</sup>=CH<sub>3</sub>, R<sup>2</sup>=Cl). Prepared from 1-(4-chlorophenyl)-3-(4-methoxyphenyl)-1H-pyrazole-4-carbaldehyde (**8b**) (0.95 g, 3 mmol). Yield 0.88 g (93%) as an orange solid. m.p: 112 - 114° C, R<sub>f</sub>: 0.06 (petroleum ether - EtOAc 4:1 v/v). <sup>1</sup>H NMR (DMSO-d<sub>6</sub>): δ 8.51 (s, 1H, pyrazole), 7.93 (d,  $J = 9.0$  Hz, 2H, Ar), 7.83 (d,  $J = 9.0$  Hz, 2H, Ar), 7.57 (d,  $J = 9.0$  Hz, 2H, Ar), 7.05 (d,  $J = 9.0$  Hz, 2H, Ar), 5.20 (t,  $J = 5.0$  Hz, 1H, OH), 4.53 (d,  $J = 5.0$  Hz, 2H, CH<sub>2</sub>OH), 3.81 (s, 3H, OCH<sub>3</sub>). <sup>13</sup>C NMR (DMSO-d<sub>6</sub>): δ 159.66 (C, Ar), 151.05 (C, pyrazole), 138.86 (C, Ar), 130.36 (C, Ar), 129.91 (2 x CH, Ar), 129.22 (CH, pyrazole), 129.14 (2 x CH, Ar), 125.74 (C, Ar), 122.37 (C, pyrazole), 119.97 (2 x CH, Ar), 114.48 (2 x CH, Ar), 55.62 (OCH<sub>3</sub>), 54.57 (CH<sub>2</sub>).

**(3-(4-Ethoxyphenyl)-1-(4-fluorophenyl)-1H-pyrazol-4-yl)methanol (9c)** (R<sup>1</sup>=CH<sub>2</sub>CH<sub>3</sub>, R<sup>2</sup>=F). Variation to method - The crude product was purified by gradient column chromatography and the pure compound eluted with CH<sub>2</sub>Cl<sub>2</sub> - MeOH 99:1 v/v. Prepared from 3-(4-ethoxyphenyl)-1-(4-fluorophenyl)-1H-pyrazole-4-carbaldehyde (**8c**) (2.5 g, 8 mmol). Yield 1.687 g (68%) as a light brown solid. m.p: 106 - 108° C, R<sub>f</sub>: 0.09 (petroleum ether - EtOAc 4:1 v/v). <sup>1</sup>H NMR (DMSO-d<sub>6</sub>): δ 8.46 (s, 1H, pyrazole), 7.91 (m, 2H, Ar), 7.81 (d,  $J = 9.0$  Hz, 2H, Ar), 7.35 (m, 2H, Ar), 7.02 (d,  $J = 9.0$  Hz, 2H, Ar), 5.18 (t,  $J = 5.0$  Hz, 1H, OH), 4.53 (d,  $J = 5.0$  Hz, 2H, CH<sub>2</sub>OH), 4.08 (q,  $J = 6.50$  Hz, 2H, CH<sub>2</sub>CH<sub>3</sub>), 1.36 (t,  $J = 7.0$  Hz, 3H, CH<sub>2</sub>CH<sub>3</sub>). <sup>19</sup>F NMR: (DMSO-d<sub>6</sub>): -117.16 (F - Ar). <sup>13</sup>C NMR (DMSO-d<sub>6</sub>): δ 159.55 and 161.48 (d, <sup>1</sup> $J_{CF} = 242.7$  Hz, C-F, Ar), 158.85 (C, Ar), 150.79 (C, pyrazole), 135.67 (d, <sup>4</sup> $J_{CF} = 2.5$  Hz, C, Ar), 129.24 (CH, pyrazole), 129.10 (2x CH, Ar), 125.75 (C, Ar), 122.0 (C, pyrazole), 120.32 and 120.39 (d, <sup>3</sup> $J_{CF} = 8.8$  Hz, 2 x CH, Ar), 116.61 and 116.79 (d, <sup>2</sup> $J_{CF} = 22.6$  Hz, 2 x CH, Ar), 114.90 (2 x CH, Ar), 63.51 (CH<sub>2</sub>), 54.57 (CH<sub>2</sub>OH), 15.10 (CH<sub>3</sub>).

**(1-(4-Chlorophenyl)-3-(4-ethoxyphenyl)-1H-pyrazol-4-yl)methanol (9d)** (R<sup>1</sup>=CH<sub>2</sub>CH<sub>3</sub>, R<sup>2</sup>=Cl). Prepared from 1-(4-chlorophenyl)-3-(4-ethoxyphenyl)-1H-pyrazole-4-carbaldehyde (**8d**) (0.327 g, 1 mmol). Yield 0.296 g (90%) as a white crystalline solid. m.p: 128 - 130° C, R<sub>f</sub>: 0.1 (petroleum ether - EtOAc 4:1 v/v). <sup>1</sup>H NMR (DMSO-d<sub>6</sub>): δ 8.50 (s, 1H, pyrazole), 7.92 (d,  $J = 9.0$  Hz, 2H, Ar), 7.81 (d,  $J = 9.0$  Hz, 2H, Ar), 7.56 (d,  $J = 9.0$  Hz, 2H, Ar), 7.02 (d,  $J = 9.0$  Hz, 2H, Ar), 5.20 (t,  $J = 4.95$  Hz, 1H, OH), 4.51 (d,  $J = 4.9$  Hz, 2H, CH<sub>2</sub>OH), 4.08 (q,  $J = 7.0$  Hz, 2H, CH<sub>2</sub>CH<sub>3</sub>), 1.36 (t,  $J = 7.0$  Hz, 3H, CH<sub>2</sub>CH<sub>3</sub>). <sup>13</sup>C NMR (DMSO-

$d_6$ ):  $\delta$  158.93 (C, Ar), 151.06 (C, pyrazole), 138.86 (C, Ar), 130.35 (C, Ar), 129.91 (2 x CH, Ar), 129.22 (2 x CH, Ar), 129.14 (CH, pyrazole), 125.61 (C, Ar), 122.35 (C, pyrazole), 119.95 (2 x CH, Ar), 114.91 (2 x CH, Ar), 63.53 (CH<sub>2</sub>), 54.57 (CH<sub>2</sub>), 15.13 (CH<sub>3</sub>).

(1-(4-Fluorophenyl)-3-(4-propoxyphenyl)-1H-pyrazol-4-yl)methanol (**9e** R<sup>1</sup>=CH<sub>2</sub>CH<sub>2</sub>CH<sub>3</sub>, R<sup>2</sup>=F). Prepared from 1-(4-fluorophenyl)-3-(4-propoxyphenyl)-1H-pyrazole-4-carbaldehyde (**8e**) (0.90 g, 2.77 mmol). Yield 0.80 g (89%) as an orange solid. m.p: 110 - 112° C, R<sub>f</sub>: 0.1 (petroleum ether - EtOAc 4:1 v/v). <sup>1</sup>H NMR (DMSO- $d_6$ ):  $\delta$  8.45 (s, 1H, pyrazole), 7.92 (m, 2H, Ar), 7.81 (d,  $J$  = 9.0 Hz, 2H, Ar), 7.35 (t,  $J$  = 9.0 Hz, 2H, Ar), 7.03 (d,  $J$  = 9.0 Hz, 2H, Ar), 5.18 (t,  $J$  = 5.0 Hz, 1H, OH), 4.53 (d,  $J$  = 5.0 Hz, 2H, CH<sub>2</sub>OH), 3.98 (t,  $J$  = 6.5 Hz, 2H, OCH<sub>2</sub>), 1.76 (m, 2H, CH<sub>3</sub>CH<sub>2</sub>), 1.0 (d,  $J$  = 7.5 Hz, 3H, CH<sub>3</sub>). <sup>19</sup>F NMR: (DMSO- $d_6$ ): -117.16 (F-Ar). <sup>13</sup>C NMR (DMSO- $d_6$ ):  $\delta$  159.55 and 161.48 (d,  $^1J_{CF}$  = 242.7 Hz, C-F, Ar), 159.02 (C, Ar), 150.79 (C, pyrazole), 136.68 (d,  $^4J_{CF}$  = 2.5 Hz, C, Ar), 129.23 (CH, pyrazole), 129.10 (2x CH, Ar), 125.75 (C, Ar), 122.01 (C, pyrazole), 120.33 and 120.39 (d,  $^3J_{CF}$  = 7.6 Hz, 2 x CH, Ar), 116.61 and 116.79 (d,  $^2J_{CF}$  = 22.60 Hz, 2 x CH, Ar), 114.94 (2x CH, Ar), 69.42 (OCH<sub>2</sub>), 54.58 (CH<sub>2</sub>), 22.53 (CH<sub>2</sub>CH<sub>3</sub>), 10.89 (CH<sub>3</sub>).

(1-(4-Chlorophenyl)-3-(4-propoxyphenyl)-1H-pyrazol-4-yl)methanol (**9f** R<sup>1</sup>=CH<sub>2</sub>CH<sub>2</sub>CH<sub>3</sub>, R<sup>2</sup>=Cl). Prepared from 1-(4-chlorophenyl)-3-(4-propoxyphenyl)-1H-pyrazole-4-carbaldehyde (**8f**) (0.90 g, 2.77 mmol). Yield 0.64 g (80%) as a light brown solid. m.p: 100 - 102° C, R<sub>f</sub>: 0.08 (petroleum ether - EtOAc 4:1 v/v). <sup>1</sup>H NMR (DMSO- $d_6$ ):  $\delta$  8.51 (s, 1H, pyrazole), 7.93 (d,  $J$  = 9.0 Hz, 2H, Ar), 7.82 (d,  $J$  = 9.0 Hz, 2H, Ar), 7.57 (d,  $J$  = 9.0 Hz, 2H, Ar), 7.03 (d,  $J$  = 9.0 Hz, 2H, Ar), 5.20 (t,  $J$  = 5.0 Hz, 1H, OH), 4.53 (d,  $J$  = 4.50 Hz, 2H, CH<sub>2</sub>OH), 3.98 (t,  $J$  = 7.0 Hz, 2H, OCH<sub>2</sub>), 1.77 (m, 2H, CH<sub>3</sub>CH<sub>2</sub>), 1.0 (d,  $J$  = 7.50 Hz, 3H, CH<sub>3</sub>). <sup>13</sup>C NMR (DMSO- $d_6$ ):  $\delta$  159.10 (C, Ar), 151.06 (C, pyrazole), 138.86 (C, Ar), 130.35 (C, Ar), 129.91 (2 x CH, Ar), 129.21 (CH, pyrazole), 129.13 (2 x CH, Ar), 125.60 (C, Ar), 122.35 (C, pyrazole), 119.95 (2 x CH, Ar), 114.96 (2 x CH, Ar), 69.43 (OCH<sub>2</sub>), 54.58 (CH<sub>2</sub>), 22.53 (CH<sub>2</sub>CH<sub>3</sub>), 10.90 (CH<sub>3</sub>).

(1-(4-Fluorophenyl)-3-(4-isopropoxyphenyl)-1H-pyrazol-4-yl)methanol (**9g** R<sup>1</sup>=CH(CH<sub>3</sub>)<sub>2</sub>, R<sup>2</sup>=F). Prepared from 1-(4-fluorophenyl)-3-(4-isopropoxyphenyl)-1H-pyrazole-4-carbaldehyde (**8g**) (0.80 g, 2.45 mmol). Yield 0.65 g (81%) as a buff solid. m.p: 110 - 112° C, R<sub>f</sub>: 0.1 (petroleum ether - EtOAc 4:1 v/v). <sup>1</sup>H NMR (DMSO- $d_6$ ):  $\delta$  8.45 (s, 1H, pyrazole), 7.91 (m, 2H, Ar), 7.80 (d,  $J$  = 9.0 Hz, 2H, Ar), 7.35 (m, 2H, Ar), 7.0 (d,  $J$  = 9.0 Hz, 2H, Ar), 5.18 (t,  $J$  = 5.0 Hz, 1H, OH), 4.67 (m, 1H, CH), 4.52 (d,  $J$  = 4.5 Hz, 2H, CH<sub>2</sub>OH), 1.30 (d,  $J$  = 6.0 Hz, 6H, 2 x CH<sub>3</sub>). <sup>19</sup>F NMR: (DMSO- $d_6$ ): -117.16 (F - Ar). <sup>13</sup>C NMR (DMSO- $d_6$ ):  $\delta$  159.55 and 161.48 (d,  $^1J_{CF}$  = 242.7 Hz, C-F, Ar), 157.79 (C, Ar), 150.81 (C, pyrazole), 136.69 (d,  $^4J_{CF}$  = 2.5 Hz, C, Ar), 129.22 (CH, pyrazole), 129.15 (2 x CH, Ar), 125.60 (C, Ar), 121.99 (C, pyrazole), 120.31 and 120.38 (d,  $^3J_{CF}$  = 8.8 Hz, 2 x CH, Ar), 116.61 and 116.80 (d,  $^2J_{CF}$  = 23.9 Hz, 2 x CH, Ar), 116.0 (2 x CH, Ar), 69.60 (CH), 54.57 (CH<sub>2</sub>), 22.32 (2x CH<sub>3</sub>).

(1-(4-Chlorophenyl)-3-(4-isopropoxyphenyl)-1H-pyrazol-4-yl)methanol (**9h** R<sup>1</sup>= CH(CH<sub>3</sub>)<sub>2</sub>, R<sup>2</sup>=Cl). Prepared from 1-(4-chlorophenyl)-3-(4-isopropoxyphenyl)-1H-pyrazole-4-carbaldehyde (**8h**) (0.80 g, 2.3 mmol). Yield 0.77 g (98%) as a brown solid. m.p: 116 - 118° C, R<sub>f</sub>: 0.09 (petroleum ether - EtOAc 4:1 v/v). <sup>1</sup>H NMR (DMSO- $d_6$ ):  $\delta$  8.51 (s, 1H, pyrazole), 7.91 (d,  $J$  = 9.0 Hz, 2H, Ar), 7.80 (d,  $J$  = 8.5 Hz, 2H, Ar), 7.56 (d,  $J$  = 9.0 Hz, 2H, Ar), 7.0 (d,  $J$  = 9.0 Hz, 2H, Ar), 5.19 (t,  $J$  = 5.0 Hz, 1H, OH), 4.68 (m, 1H, CH), 4.52 (d,  $J$  = 5.0 Hz, 2H, CH<sub>2</sub>OH), 1.30 (d,  $J$  = 6.0 Hz, 6H, 2 x CH<sub>3</sub>). <sup>13</sup>C NMR (DMSO- $d_6$ ):  $\delta$  157.87 (C, Ar), 151.08 (C, pyrazole), 138.87 (C, Ar), 130.34 (C, Ar), 129.91 (2 x CH, Ar), 129.21 (CH, pyrazole), 129.18 (2 x CH, Ar), 125.46 (C, Ar), 122.34 (C, pyrazole), 119.94 (2 x CH, Ar), 116.01 (2 x CH, Ar), 69.61 (CH), 54.57 (CH<sub>2</sub>), 22.32 (2x CH<sub>3</sub>).

**General method for the synthesis of chloride derivatives (10).** To an ice-cooled solution of alcohol (**9**) (1 equiv.) in dry CH<sub>2</sub>Cl<sub>2</sub> (2 mL/mmol) was added thionyl chloride (SOCl<sub>2</sub>) (10 equiv.) dropwise. The reaction was stirred at 40° C for 4 h. The solvent was evaporated under reduced pressure and then while cooling in an ice-bath, carefully quenched with saturated aqueous NaHCO<sub>3</sub> in portions until slightly basic (pH 8.0). The product was extracted with EtOAc (3 x 10 mL/mmol), and the combined organic layers washed with brine (3 x 4 mL/mmol), H<sub>2</sub>O (2 x 4 mL/mmol), dried (MgSO<sub>4</sub>) and evaporated under reduced pressure to give the crude chloride (**10**), which was used immediately in subsequent reactions without further purification.

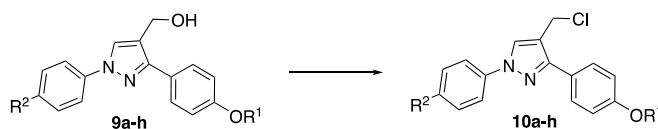

4-(Chloromethyl)-1-(4-fluorophenyl)-3-(4-methoxyphenyl)-1H-pyrazole (**10a** R<sup>1</sup>=CH<sub>3</sub>, R<sup>2</sup>=F). Prepared from (1-(4-fluorophenyl)-3-(4-methoxyphenyl)-1H-pyrazol-4-yl)methanol carbaldehyde (**9a**) (0.50 g, 1.7 mmol). Yield 0.504 g (94%) as a brown solid. m.p: 116 - 118° C, R<sub>f</sub>: 0.67 (petroleum ether - EtOAc 4:1 v/v). <sup>1</sup>H NMR (DMSO- $d_6$ ):  $\delta$  8.69 (s, 1H, pyrazole), 7.91 (m, 2H, Ar), 7.78 (d,  $J$  = 8.5 Hz, 2H, Ar), 7.38 (m, 2H, Ar), 7.08 (d,  $J$  = 9.0 Hz, 2H, Ar), 4.89 (s, 2H, CH<sub>2</sub>Cl), 3.82 (s, 3H, OCH<sub>3</sub>). <sup>19</sup>F NMR: (DMSO- $d_6$ ): -116.25 (F - Ar). <sup>13</sup>C NMR (DMSO- $d_6$ ):  $\delta$  159.89 and 161.83 (d,  $^1J_{CF}$  = 244 Hz, C-F, Ar), 159.90 (C, Ar), 150.89 (C, pyrazole), 136.26 (d,  $^4J_{CF}$  = 2.5 Hz, C, Ar), 130.78 (CH, pyrazole), 129.17 (2 x CH, Ar), 125.01 (C, Ar), 120.86 and 120.79 (d,  $^3J_{CF}$  = 8.8 Hz, 2x CH, Ar), 117.67 (C, pyrazole), 116.91 and 116.72 (d,  $^2J_{CF}$  = 23.8 Hz, 2 x CH, Ar), 114.70 (2 x CH, Ar), 55.67 (OCH<sub>3</sub>), 38.40 (CH<sub>2</sub>Cl).

4-(Chloromethyl)-1-(4-chlorophenyl)-3-(4-methoxyphenyl)-1H-pyrazole (**10b** R<sup>1</sup>=CH<sub>3</sub>, R<sup>2</sup>=Cl). Prepared from (1-(4-chlorophenyl)-3-(4-methoxyphenyl)-1H-pyrazol-4-yl)methanol carbaldehyde (**9b**) (0.80 g, 2.5 mmol). Yield 0.825 g (99%) as a brown oil. R<sub>f</sub>: 0.67 (petroleum ether - EtOAc 4:1 v/v). <sup>1</sup>H NMR (DMSO-d<sub>6</sub>): δ 8.74 (s, 1H, pyrazole), 7.91 (d, J = 8.5 Hz, 2H, Ar), 7.78 (d, J = 9.0 Hz, 2H, Ar), 7.59 (d, J = 9.0 Hz, 2H, Ar), 7.08 (d, J = 9.0 Hz, 2H, Ar), 4.89 (s, 2H, CH<sub>2</sub>Cl), 3.82 (s, 3H, CH<sub>3</sub>). <sup>13</sup>C NMR (DMSO-d<sub>6</sub>): δ 159.95 (C, Ar), 151.12 (C, pyrazole), 138.46 (C, Ar), 131.04 (C, Ar), 130.76 (CH, pyrazole), 130.0 (2 x CH, Ar), 129.20 (2 x CH, Ar), 124.88 (C, Ar), 120.34 (2 x CH, Ar), 118.0 (C, pyrazole), 114.72 (2 x CH, Ar), 55.68 (CH<sub>3</sub>), 38.30 (CH<sub>2</sub>Cl).

4-(Chloromethyl)-3-(4-ethoxyphenyl)-1-(4-fluorophenyl)-1H-pyrazole (**10c** R<sup>1</sup>=CH<sub>2</sub>CH<sub>3</sub>, R<sup>2</sup>=F). Prepared from (3-(4-ethoxyphenyl)-1-(4-fluorophenyl)-1H-pyrazol-4-yl)methanol (**9c**) (0.30 g, 1.0 mmol). Yield 0.295 g (98%) as a brown oil. R<sub>f</sub>: 0.64 (petroleum ether - EtOAc 4:1 v/v). <sup>1</sup>H NMR (DMSO-d<sub>6</sub>): δ 8.69 (s, 1H, pyrazole), 7.91 (m, 2H, Ar), 7.76 (d, J = 9.0 Hz, 2H, Ar), 7.38 (m, 2H, Ar), 7.06 (d, J = 9.0 Hz, 2H, Ar), 4.89 (s, 2H, CH<sub>2</sub>Cl), 4.09 (q, J = 7.0 Hz, 2H, CH<sub>2</sub>CH<sub>3</sub>), 1.36 (t, J = 7.0 Hz, 3H, CH<sub>2</sub>CH<sub>3</sub>). <sup>19</sup>F NMR: (DMSO-d<sub>6</sub>): -116.27 (F - Ar). <sup>13</sup>C NMR (DMSO-d<sub>6</sub>): δ 159.89 and 161.83 (d, <sup>1</sup>J<sub>CF</sub> = 244.0 Hz, C-F, Ar), 159.17 (C, Ar), 150.90 (C, pyrazole), 136.27 (d, <sup>4</sup>J<sub>CF</sub> = 2.5 Hz, C, Ar), 130.78 (CH, pyrazole), 129.16 (2 x CH, Ar), 124.87 (C, Ar), 120.85 and 120.78 (d, <sup>3</sup>J<sub>CF</sub> = 8.8 Hz, 2 x CH, Ar), 117.65 (C, pyrazole), 116.91 and 116.73 (d, <sup>2</sup>J<sub>CF</sub> = 22.6 Hz, 2 x CH, Ar), 115.13 (2 x CH, Ar), 63.59 (CH<sub>2</sub>), 38.42 (CH<sub>2</sub>Cl), 15.12 (CH<sub>3</sub>).

4-(Chloromethyl)-1-(4-chlorophenyl)-3-(4-ethoxyphenyl)-1H-pyrazole (**10d** R<sup>1</sup>=CH<sub>2</sub>CH<sub>3</sub>, R<sup>2</sup>=Cl). Prepared from (1-(4-chlorophenyl)-3-(4-ethoxyphenyl)-1H-pyrazol-4-yl)methanol carbaldehyde (**9d**) (0.99 g, 3 mmol). Yield 0.97 g (93%) as a brown solid. m.p: 90 - 92° C, R<sub>f</sub>: 0.65 (petroleum ether - EtOAc 4:1 v/v). <sup>1</sup>H NMR (DMSO-d<sub>6</sub>): δ 8.75 (s, 1H, pyrazole), 7.92 (d, J = 9.0 Hz, 2H, Ar), 7.77 (d, J = 9.0 Hz, 2H, Ar), 7.59 (d, J = 9.0 Hz, 2H, Ar), 7.07 (d, J = 9.0 Hz, 2H, Ar), 4.89 (s, 2H, CH<sub>2</sub>Cl), 4.10 (q, J = 7.0 Hz, 2H, CH<sub>2</sub>CH<sub>3</sub>), 1.36 (t, J = 7.0 Hz, 3H, CH<sub>2</sub>CH<sub>3</sub>). <sup>13</sup>C NMR (DMSO-d<sub>6</sub>): δ 159.24 (C, Ar), 151.12 (C, pyrazole), 138.47 (C, Ar), 131.02 (C, Ar), 130.77 (CH, pyrazole), 130.01 (2 x CH, Ar), 129.19 (2 x CH, Ar), 124.74 (C, Ar), 120.33 (2 x CH, Ar), 117.98 (C, pyrazole), 115.14 (2 x CH, Ar), 63.60 (CH<sub>2</sub>CH<sub>3</sub>), 38.32 (CH<sub>2</sub>Cl), 15.12 (CH<sub>2</sub>CH<sub>3</sub>).

4-(Chloromethyl)-1-(4-fluorophenyl)-3-(4-propoxyphenyl)-1H-pyrazole (**10e** R<sup>1</sup>=CH<sub>2</sub>CH<sub>2</sub>CH<sub>3</sub>, R<sup>2</sup>=F). Prepared from (1-(4-fluorophenyl)-3-(4-propoxyphenyl)-1H-pyrazol-4-yl)methanol (**9e**) (0.75 g, 2.3 mmol). Yield 0.79 g (100%) as a brown semisolid. R<sub>f</sub>: 0.68 (petroleum ether - EtOAc 4:1 v/v). <sup>1</sup>H NMR (DMSO-d<sub>6</sub>): δ 8.69 (s, 1H, pyrazole), 7.92 (m, 2H, Ar), 7.77 (d, J = 9.0 Hz, 2H, Ar), 7.37 (t, J = 9.0 Hz, 2H, Ar), 7.06 (d, J = 9.0 Hz, 2H, Ar), 4.89 (s, 2H, CH<sub>2</sub>Cl), 3.99 (t, J = 7.0 Hz, 2H, OCH<sub>2</sub>), 1.77 (m, 2H, CH<sub>2</sub>CH<sub>2</sub>), 1.0 (d, J = 7.50 Hz, 3H, CH<sub>3</sub>). <sup>19</sup>F NMR: (DMSO-d<sub>6</sub>): -116.91 (F-Ar). <sup>13</sup>C NMR (DMSO-d<sub>6</sub>): δ 159.89 and 161.82 (d, <sup>1</sup>J<sub>CF</sub> = 242.7 Hz, C-F, Ar), 159.33 (C, Ar), 150.90 (C, pyrazole), 136.28 (d, <sup>4</sup>J<sub>CF</sub> = 2.5 Hz, C, Ar), 130.77 (CH, pyrazole), 129.16 (2 x CH, Ar), 124.87 (C, Ar), 120.84 and 120.77 (d, <sup>3</sup>J<sub>CF</sub> = 8.80 Hz, 2 x CH, Ar), 117.65 (C, pyrazole), 116.90 and 116.72 (d, <sup>2</sup>J<sub>CF</sub> = 22.64 Hz, 2 x CH, Ar), 115.17 (2 x CH, Ar), 69.48 (OCH<sub>2</sub>), 38.41 (CH<sub>2</sub>Cl), 22.50 (CH<sub>2</sub>CH<sub>3</sub>), 10.88 (CH<sub>3</sub>).

4-(Chloromethyl)-1-(4-chlorophenyl)-3-(4-propoxyphenyl)-1H-pyrazole (**10f** R<sup>1</sup>=CH<sub>2</sub>CH<sub>2</sub>CH<sub>3</sub>, R<sup>2</sup>=Cl). Prepared from (1-(4-chlorophenyl)-3-(4-propoxyphenyl)-1H-pyrazol-4-yl)methanol (**9f**) (0.64 g, 1.87 mmol). Yield 0.66 g (98%) as a brown semisolid. R<sub>f</sub>: 0.67 (petroleum ether - EtOAc 4:1 v/v). <sup>1</sup>H NMR (DMSO-d<sub>6</sub>): δ 8.75 (s, 1H, pyrazole), 7.90 (d, J = 9.0 Hz, 2H, Ar), 7.76 (d, J = 9.0 Hz, 2H, Ar), 7.60 (d, J = 9.0 Hz, 2H, Ar), 7.08 (d, J = 9.0 Hz, 2H, Ar), 4.89 (s, 2H, CH<sub>2</sub>Cl), 4.0 (t, J = 6.50 Hz, 2H, OCH<sub>2</sub>), 1.77 (m, 2H, CH<sub>2</sub>CH<sub>2</sub>), 1.0 (d, J = 7.50 Hz, 3H, CH<sub>3</sub>). <sup>13</sup>C NMR (DMSO-d<sub>6</sub>): δ 159.40 (C, Ar), 151.13 (C, pyrazole), 138.47 (C, Ar), 131.02 (C, Ar), 130.76 (CH, pyrazole), 130.0 (2 x CH, Ar), 129.18 (2 x CH, Ar), 124.74 (C, Ar), 120.33 (2 x CH, Ar), 117.98 (C, pyrazole), 115.18 (2 x CH, Ar), 69.49 (OCH<sub>2</sub>), 38.32 (CH<sub>2</sub>Cl), 22.50 (CH<sub>2</sub>CH<sub>3</sub>), 10.88 (CH<sub>3</sub>).

4-(Chloromethyl)-1-(4-fluorophenyl)-3-(4-isopropoxyphenyl)-1H-pyrazole (**10g** R<sup>1</sup>= CH(CH<sub>3</sub>)<sub>2</sub>, R<sup>2</sup>=F). Prepared from (1-(4-fluorophenyl)-3-(4-isopropoxyphenyl)-1H-pyrazol-4-yl)methanol (**9g**) (0.6 g, 1.8 mmol). Yield 0.58 g (94%) as a brown oil. R<sub>f</sub>: 0.67 (petroleum ether - EtOAc 4:1 v/v). <sup>1</sup>H NMR (DMSO-d<sub>6</sub>): δ 8.69 (s, 1H, pyrazole), 7.91 (m, 2H, Ar), 7.76 (d, J = 8.5 Hz, 2H, Ar), 7.38 (t, J = 9.0 Hz, 2H, Ar), 7.06 (d, J = 8.50 Hz, 2H, Ar), 4.89 (s, 2H, CH<sub>2</sub>Cl), 4.69 (m, 1H, CH), 1.31 (d, J = 6.0 Hz, 6H, 2 x CH<sub>3</sub>). <sup>19</sup>F NMR: (DMSO-d<sub>6</sub>): -116.95 (F-Ar). <sup>13</sup>C NMR (DMSO-d<sub>6</sub>): δ 159.89 and 161.82 (d, <sup>1</sup>J<sub>CF</sub> = 242.7 Hz, C-F, Ar), 158.12 (C, Ar), 150.91 (C, pyrazole), 136.28 (d, <sup>4</sup>J<sub>CF</sub> = 2.5 Hz, C, Ar), 130.77 (CH, pyrazole), 129.20 (2 x CH, Ar), 124.70 (C, Ar), 120.82 and 120.76 (d, <sup>3</sup>J<sub>CF</sub> = 7.6 Hz, 2 x CH, Ar), 117.64 (C, pyrazole), 116.91 and 116.72 (d, <sup>2</sup>J<sub>CF</sub> = 23.8 Hz, 2 x CH, Ar), 116.18 (2 x CH, Ar), 69.68 (CH), 38.43 (CH<sub>2</sub>Cl), 22.30 (2 x CH<sub>3</sub>).

4-(Chloromethyl)-1-(4-chlorophenyl)-3-(4-isopropoxyphenyl)-1H-pyrazole (**10h** R<sup>1</sup>= CH(CH<sub>3</sub>)<sub>2</sub>, R<sup>2</sup>=Cl). Prepared from (1-(4-chlorophenyl)-3-(4-isopropoxyphenyl)-1H-pyrazol-4-yl)methanol (**9h**) (0.7 g, 2.0 mmol). Yield 0.68 g (94%) as a brown oil. R<sub>f</sub>: 0.68 (petroleum ether - EtOAc 4:1 v/v). <sup>1</sup>H NMR (DMSO-d<sub>6</sub>): δ 8.75 (s, 1H, pyrazole), 7.92 (d, J = 9.0 Hz, 2H, Ar), 7.76 (d, J = 9.0 Hz, 2H, Ar), 7.60 (d, J = 9.0 Hz, 2H, Ar), 7.06 (d, J = 8.50 Hz, 2H, Ar), 4.89 (s, 2H, CH<sub>2</sub>Cl), 4.69 (m, 1H, CH), 1.31 (d, J = 6.0 Hz, 6H, 2 x CH<sub>3</sub>). <sup>13</sup>C NMR (DMSO-d<sub>6</sub>): δ 158.20 (C, Ar), 151.13 (C, pyrazole), 138.48 (C, Ar), 131.01 (C, Ar), 130.76 (CH, pyrazole), 130.0 (2 x CH, Ar), 129.23 (2 x CH, Ar), 124.57 (C, Ar), 120.32 (2 x CH, Ar), 117.97 (C, pyrazole), 116.19 (2 x CH, Ar), 69.69 (CH), 38.33 (CH<sub>2</sub>Cl), 22.30 (2 x CH<sub>3</sub>).

## Reference

1. F.A. Ragab, N.M. Abdel Gawad, H.H. Georgey, and M.F. Said. *Eur. J. Med. Chem.* 2013, **63**, 645–654.

### HPLC analysis

The purity of the final compound **12h** was determined by HPLC UV with correlating MS in Positive ionization mode on a Zorbax Eclipse Plus C18 Rapid Resolution 2.1 x 50 mm, 1.8  $\mu$ m particle size using a 7.5-minute gradient method 5:95 v/v water: methanol with 0.1% formic acid as additive.

The HPLC data of compound **12h** (HPLC purity 97.0 %. Peak at 4.88 min):

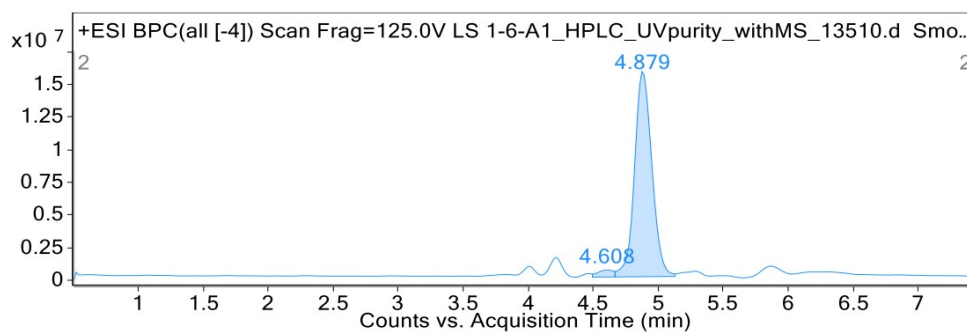

Figure 1: Base peak chromatogram

#### User Chromatogram Peak List

| RT (min) | Area      | Area % | Area Sum (%) | Base Peak (m/z) | Width (min) |
|----------|-----------|--------|--------------|-----------------|-------------|
| 4.61     | 4476097   | 3.06   | 2.97         | 388.0761        | 0.126       |
| 4.88     | 146185884 | 100.00 | 97.03        | 394.1378        | 0.148       |

#### Compound Table

| Compound Label                                             | RT (min) | Observed mass (m/z) | Neutral observed mass (Da) | Theoretical mass (Da) | Mass error (ppm) | Isotope match score (%) |
|------------------------------------------------------------|----------|---------------------|----------------------------|-----------------------|------------------|-------------------------|
| Cpd 1: C <sub>21</sub> H <sub>20</sub> Cl N <sub>5</sub> O | 4.88     | 394.1443            | 393.1371                   | 393.1356              | 3.74             | 92.41                   |

Mass errors of between -5.00 and 5.00 ppm with isotope match scores above 60% are considered confirmation of molecular formulae

The  $^1\text{H}$ - and  $^{13}\text{C}$ -NMR spectra of all final compounds are shown here:

$^1\text{H}$  NMR spectrum (500 MHz,  $\text{DMSO-d}_6$ ) of **11a**:

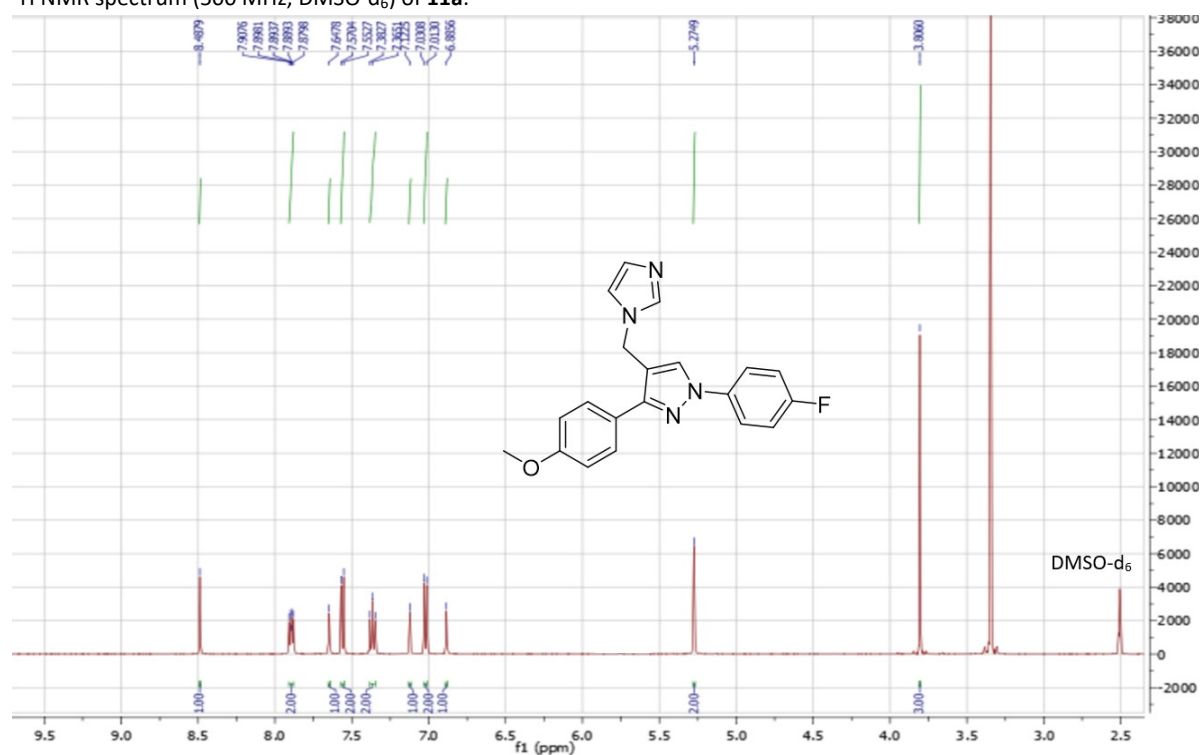

$^{13}\text{C}$  NMR spectrum (125.75 MHz,  $\text{DMSO-d}_6$ ) of **11a**:

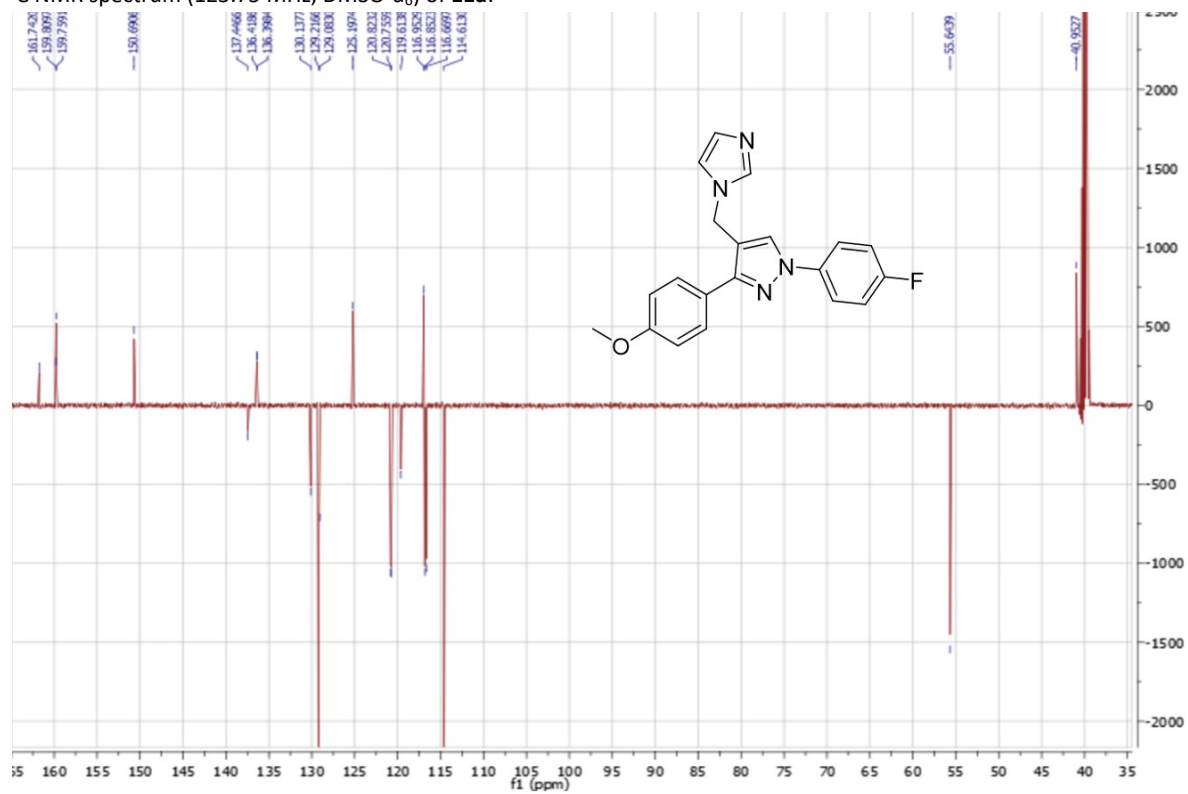



$^{19}\text{F}$  NMR (470 MHz,  $\text{DMSO-d}_6$ ) of **11a**:

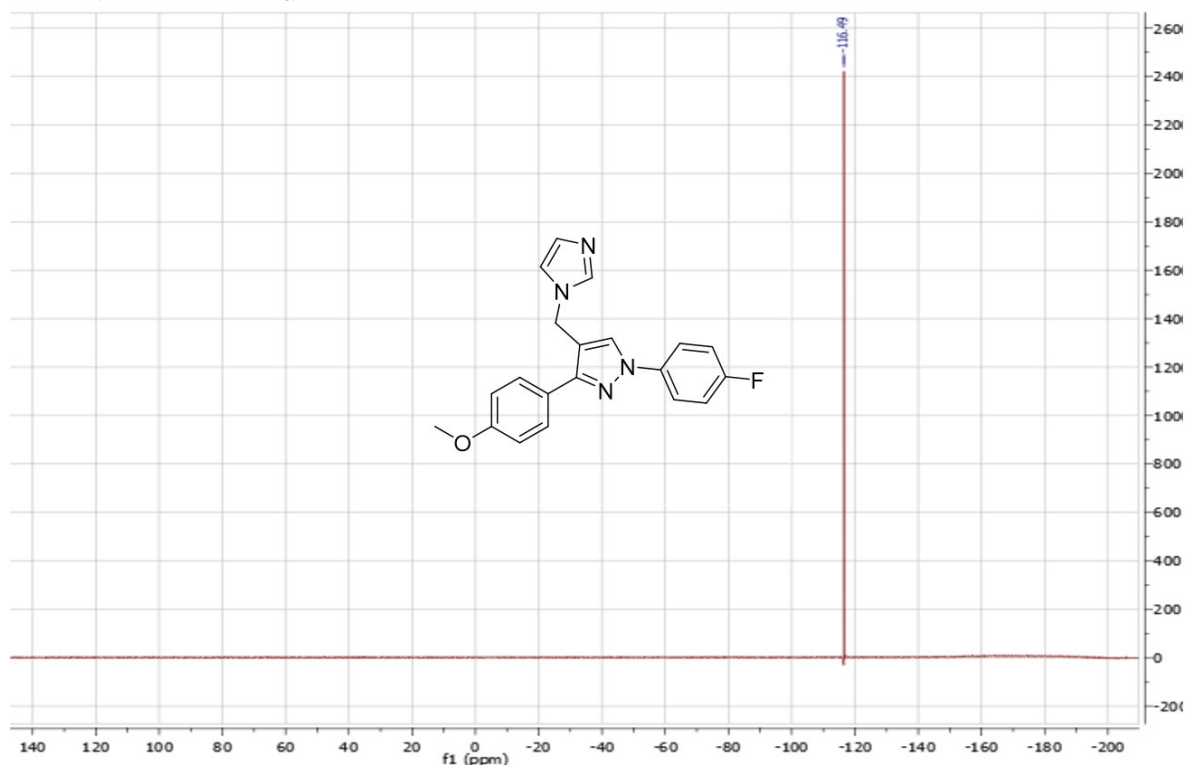

$^1\text{H}$  NMR spectrum (500 MHz,  $\text{DMSO-d}_6$ ) of **11b**:

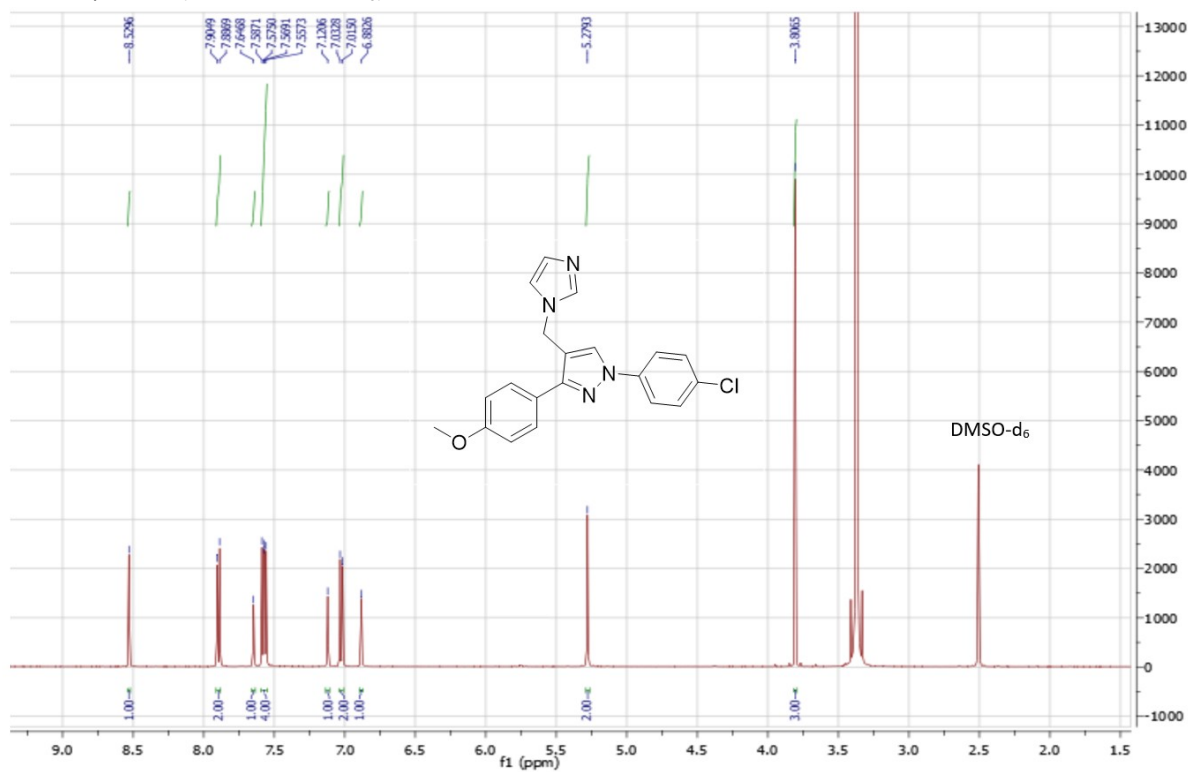

<sup>13</sup>C NMR spectrum (125.75 MHz, DMSO-d<sub>6</sub>) of **11b**:

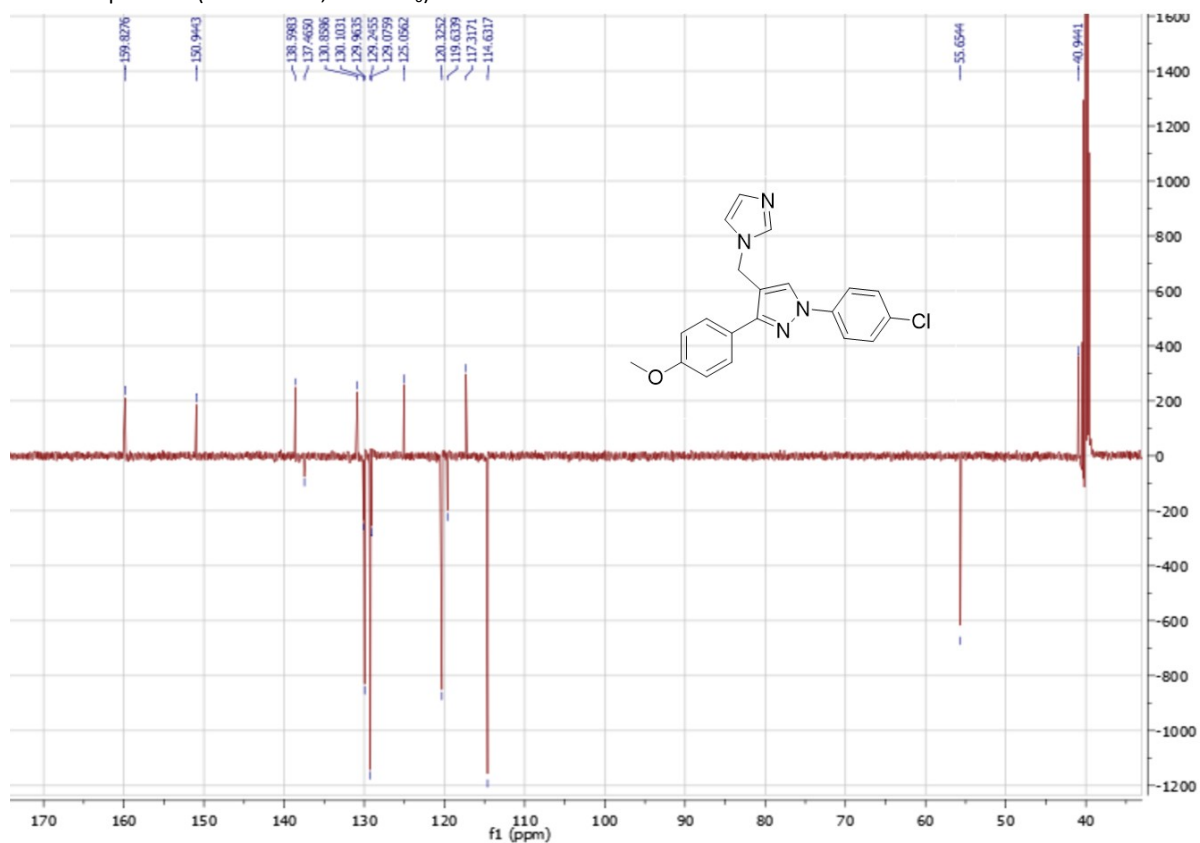

<sup>1</sup>H NMR spectrum (500 MHz, DMSO-d<sub>6</sub>) of **11c**:

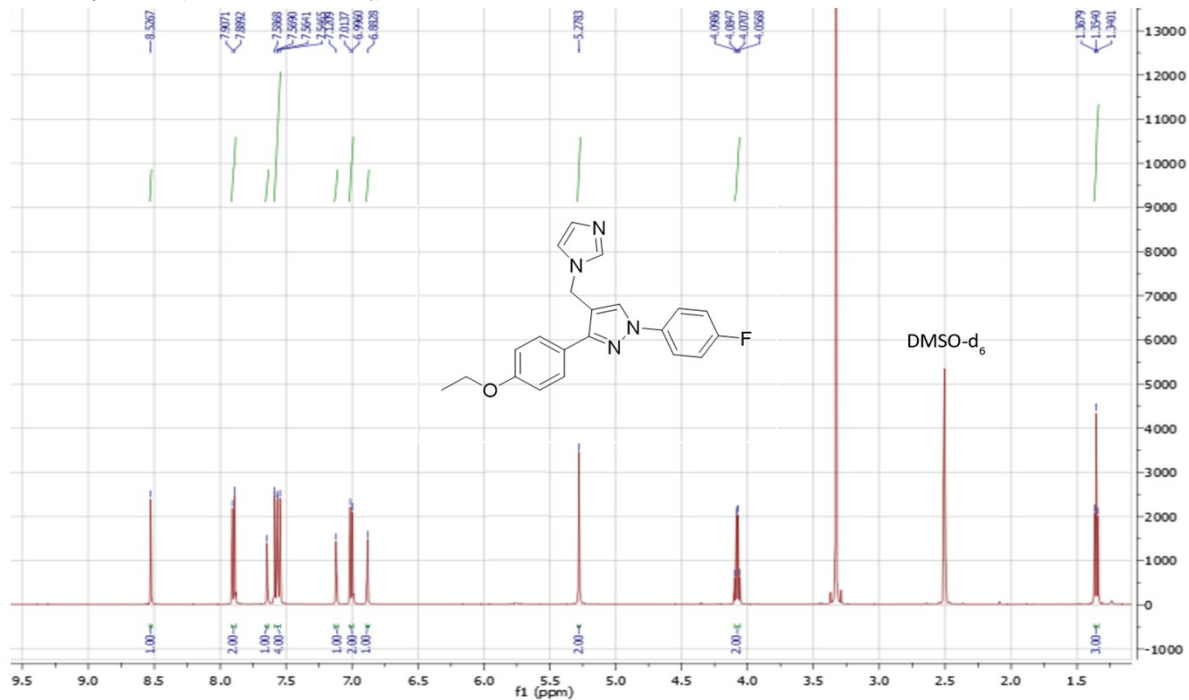

<sup>13</sup>C NMR spectrum (125.75 MHz, DMSO-d<sub>6</sub>) of **11c**:

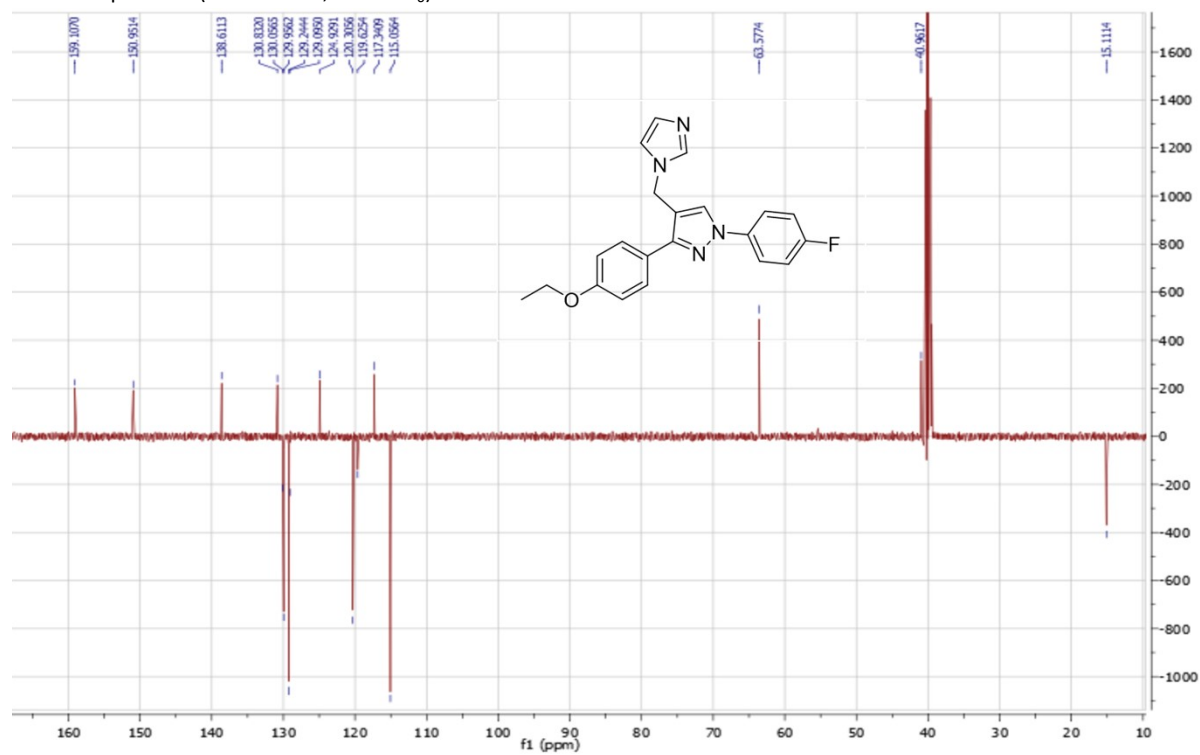

<sup>19</sup>F NMR (470 MHz, DMSO-d<sub>6</sub>) of **11c**:

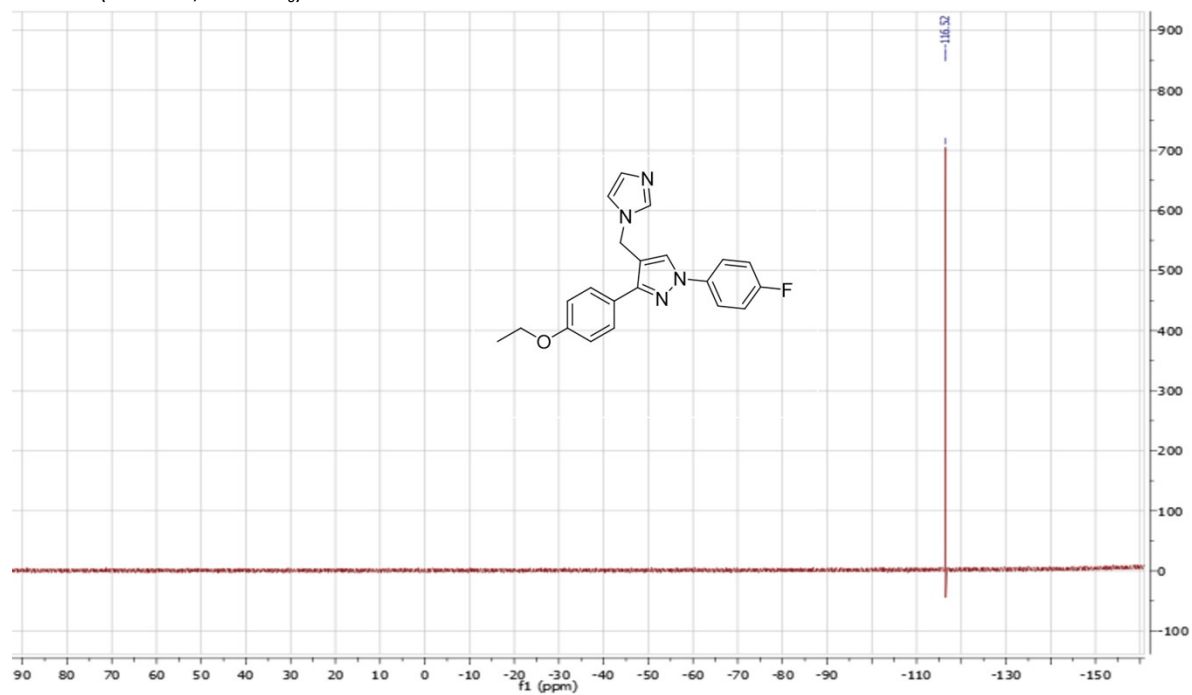

<sup>1</sup>H NMR spectrum (500 MHz, DMSO-d<sub>6</sub>) of **11d**:

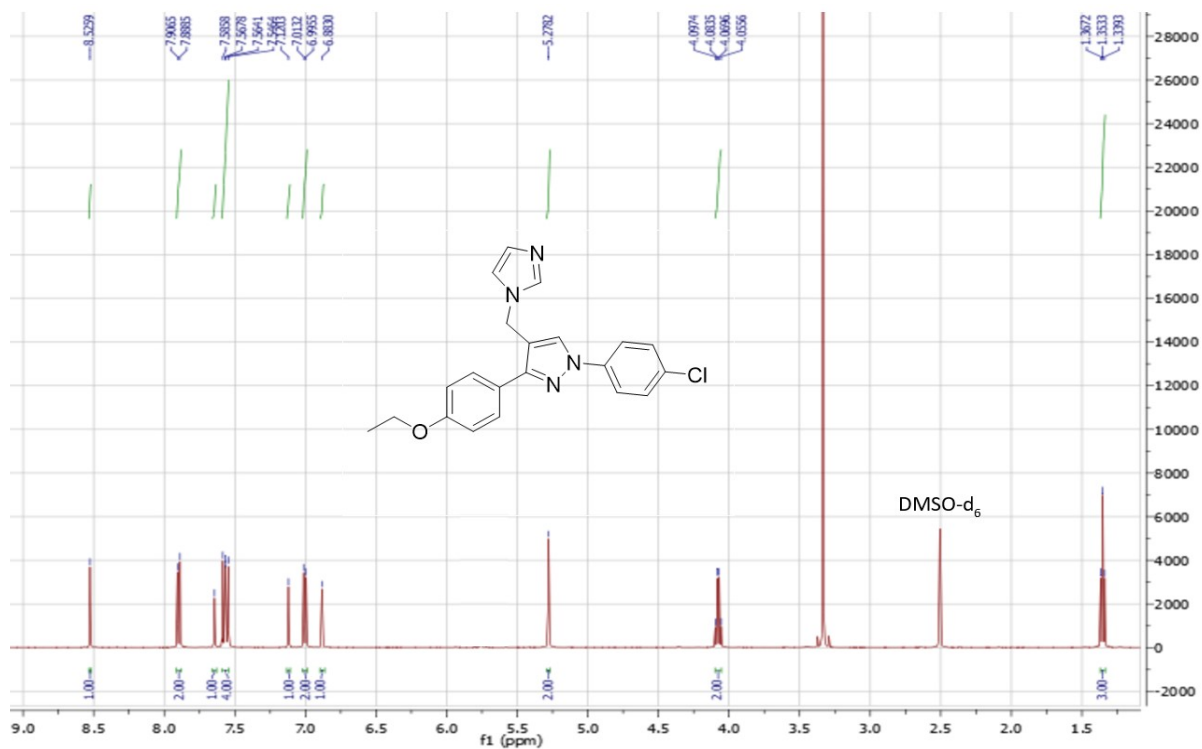

<sup>13</sup>C NMR spectrum (125.75 MHz, DMSO-d<sub>6</sub>) of **11d**:

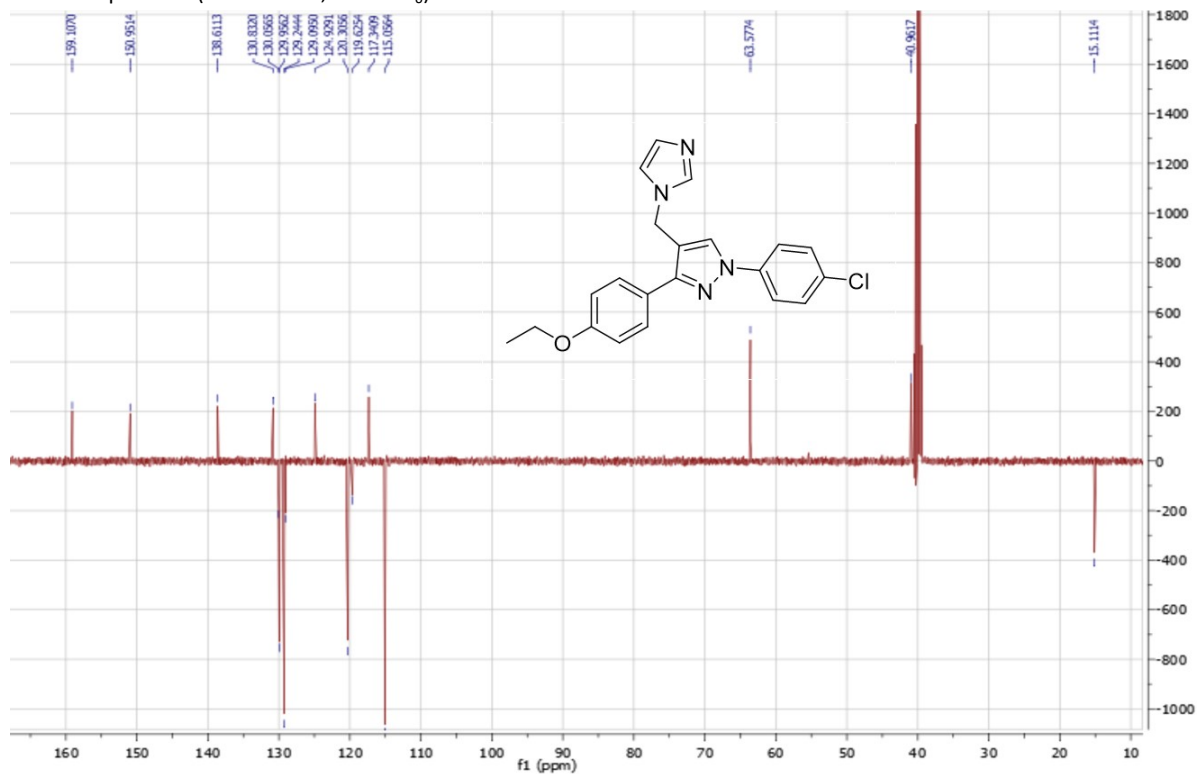

<sup>1</sup>H NMR spectrum (500 MHz, DMSO-d<sub>6</sub>) of **11e**:

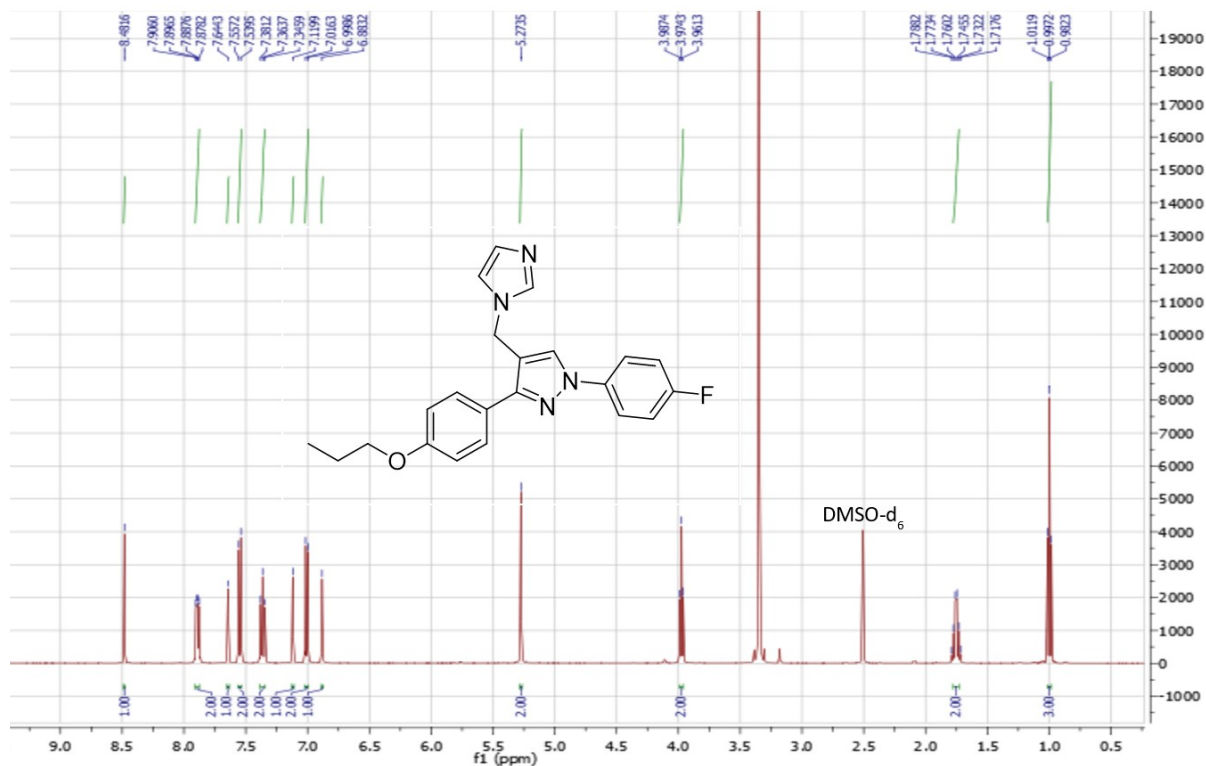

<sup>13</sup>C NMR spectrum (125.75 MHz, DMSO-d<sub>6</sub>) of **11e**:

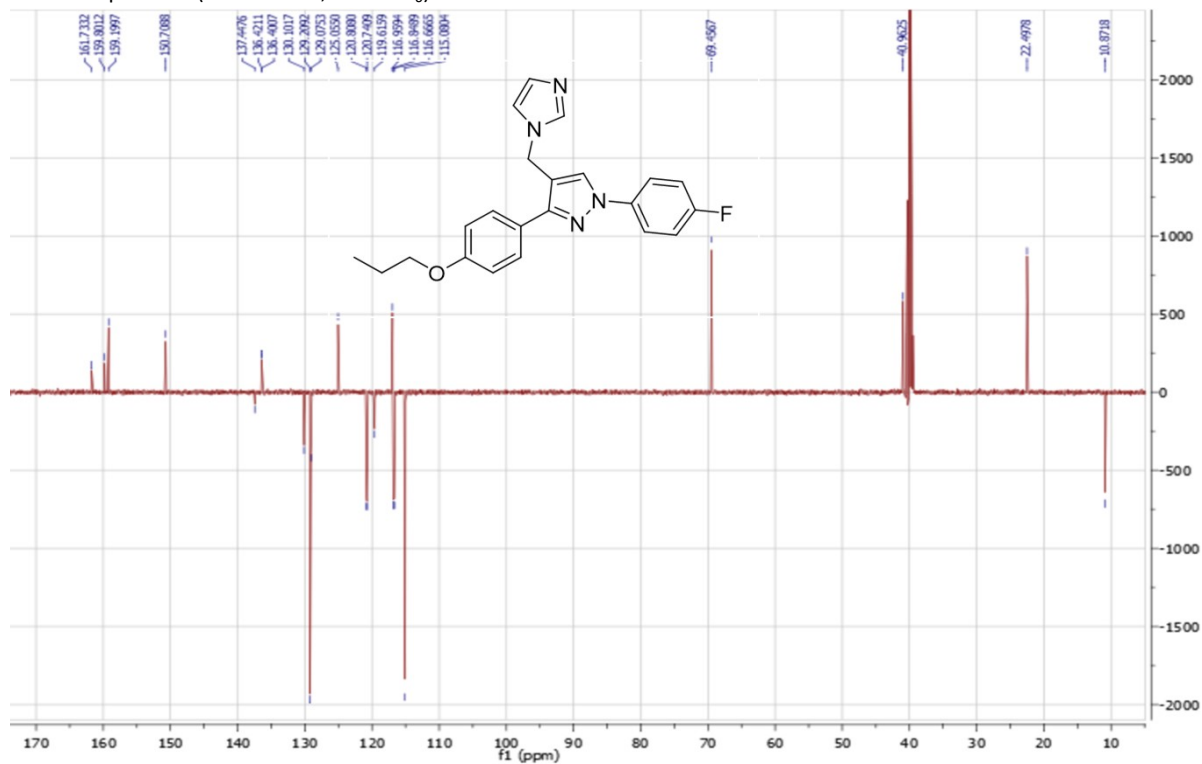

$^{19}\text{F}$  NMR (470 MHz,  $\text{DMSO-d}_6$ ) of **11e**:

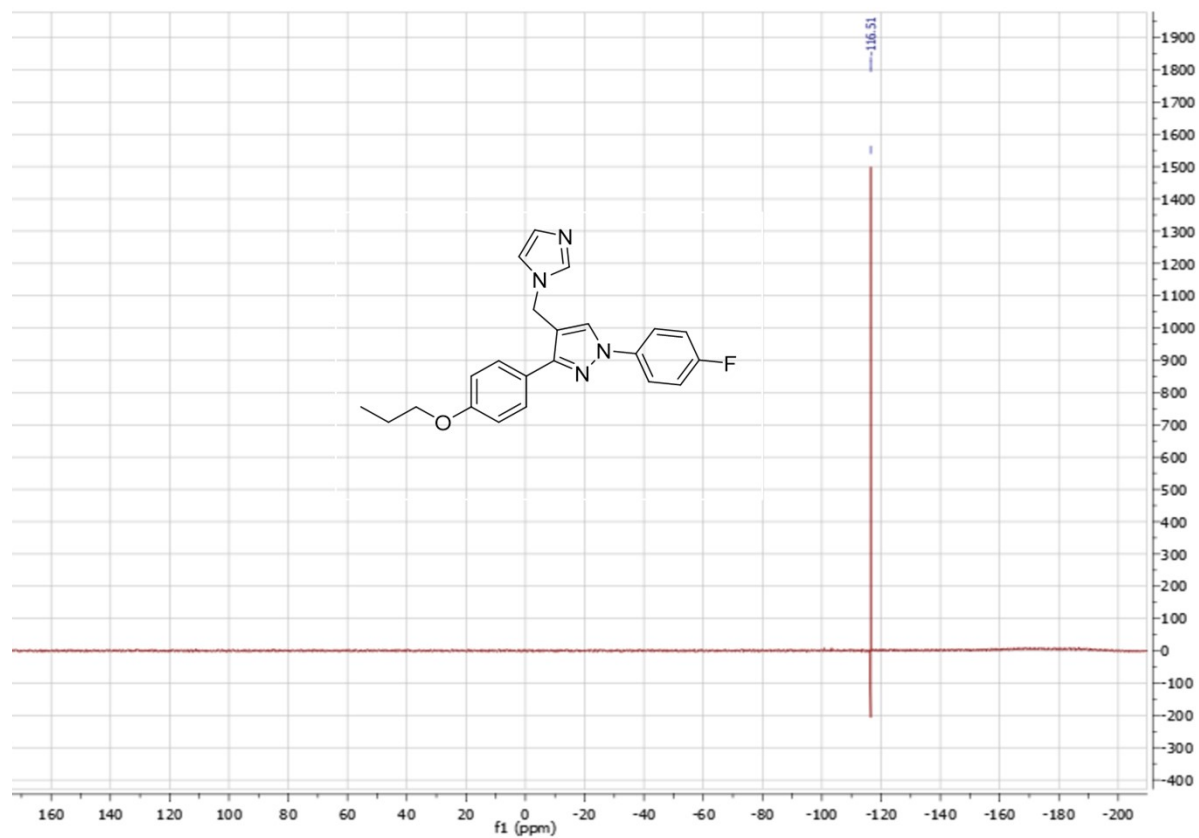

$^1\text{H}$  NMR spectrum (500 MHz,  $\text{DMSO-d}_6$ ) of **11f**:

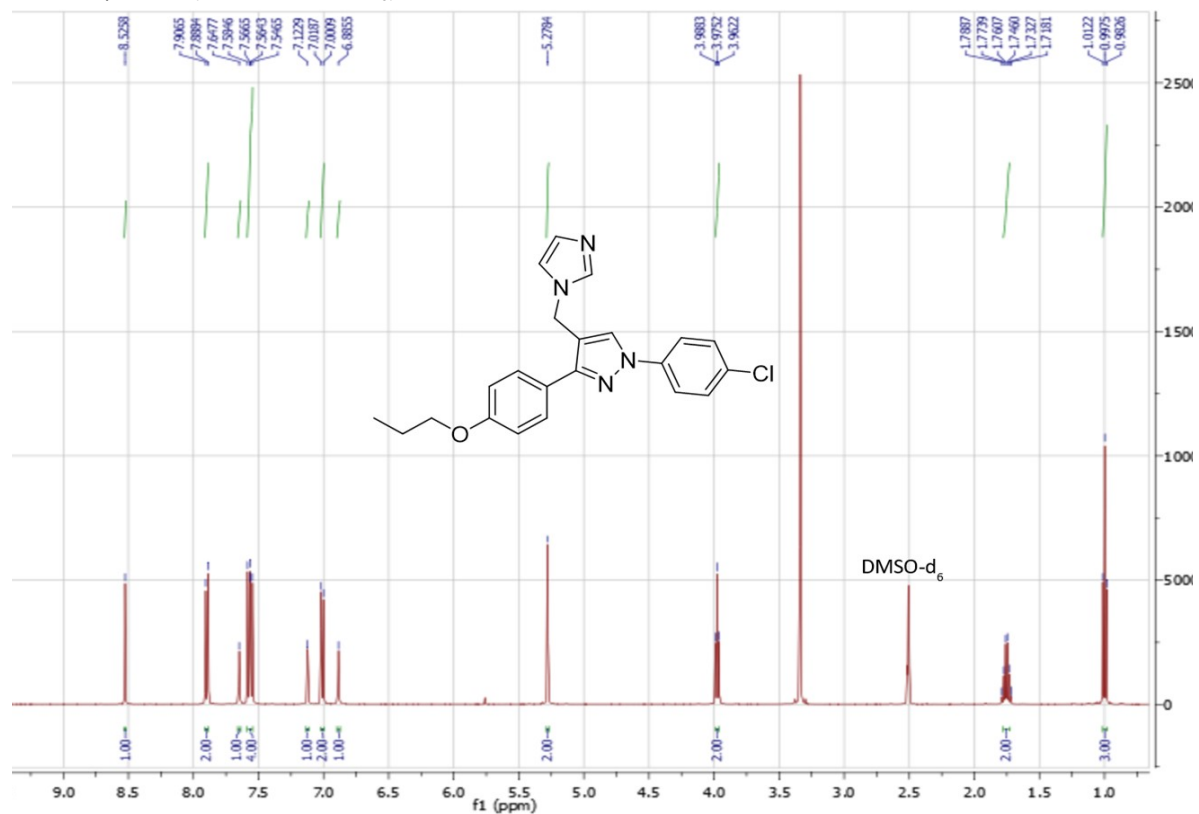

$^{13}\text{C}$  NMR spectrum (125.75 MHz,  $\text{DMSO-d}_6$ ) of **11f**:

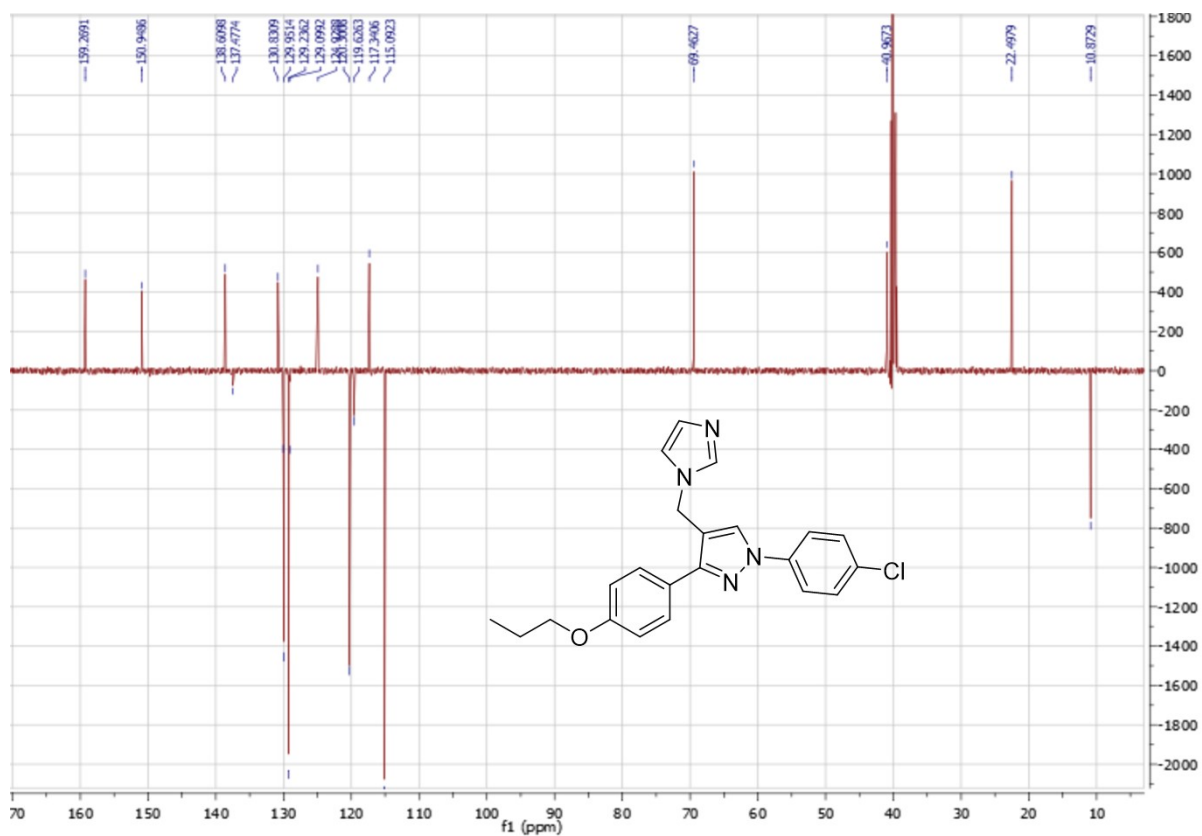

<sup>1</sup>H NMR spectrum (500 MHz, DMSO-d<sub>6</sub>) of **11g**:

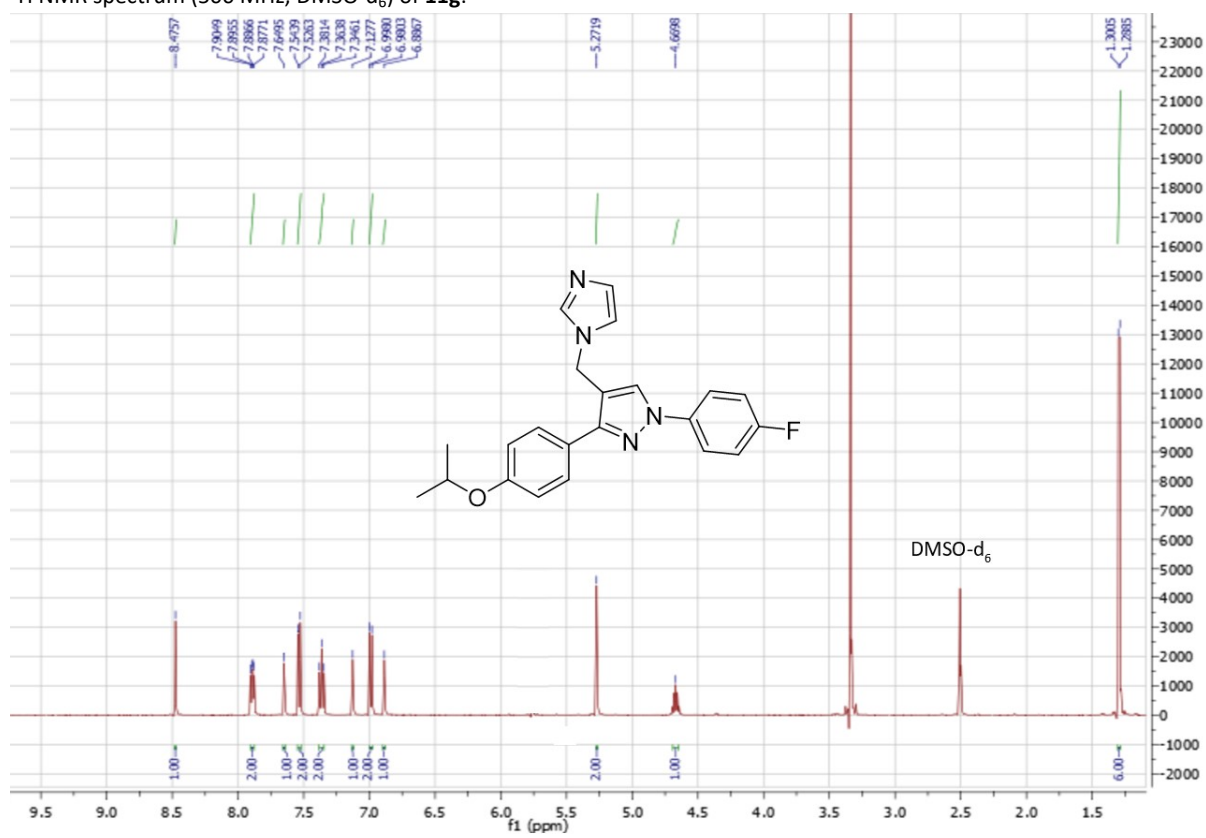

<sup>13</sup>C NMR spectrum (125.75 MHz, DMSO-d<sub>6</sub>) of **11g**:

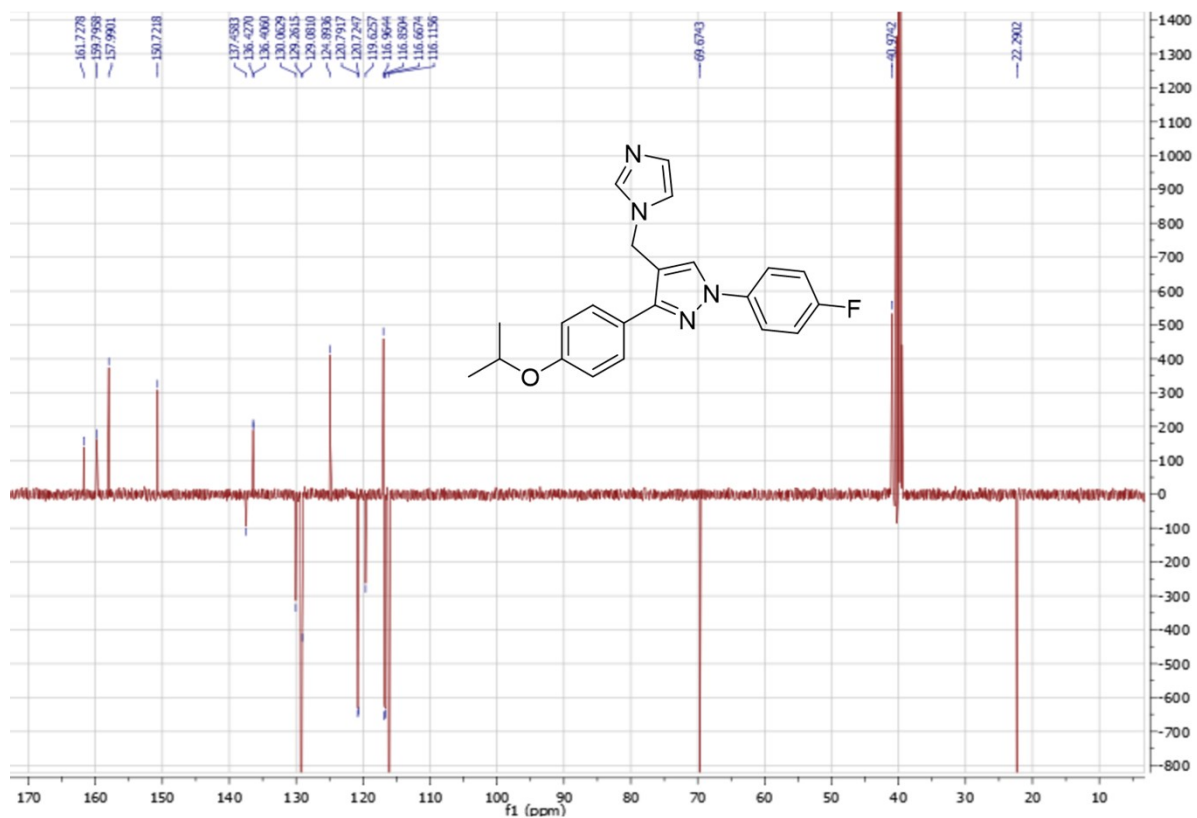

<sup>19</sup>F NMR (470 MHz, DMSO-d<sub>6</sub>) of **11g**:

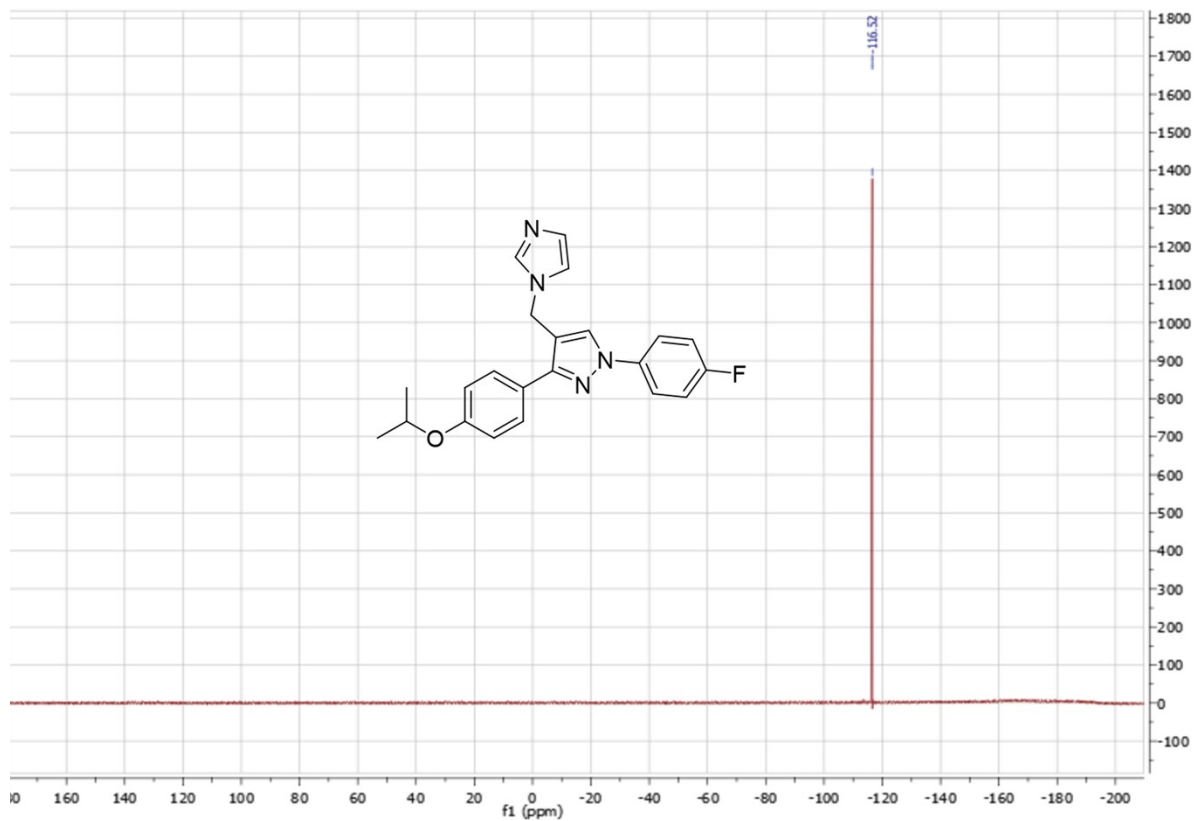

<sup>1</sup>H NMR spectrum (500 MHz, DMSO-d<sub>6</sub>) of **11h**:



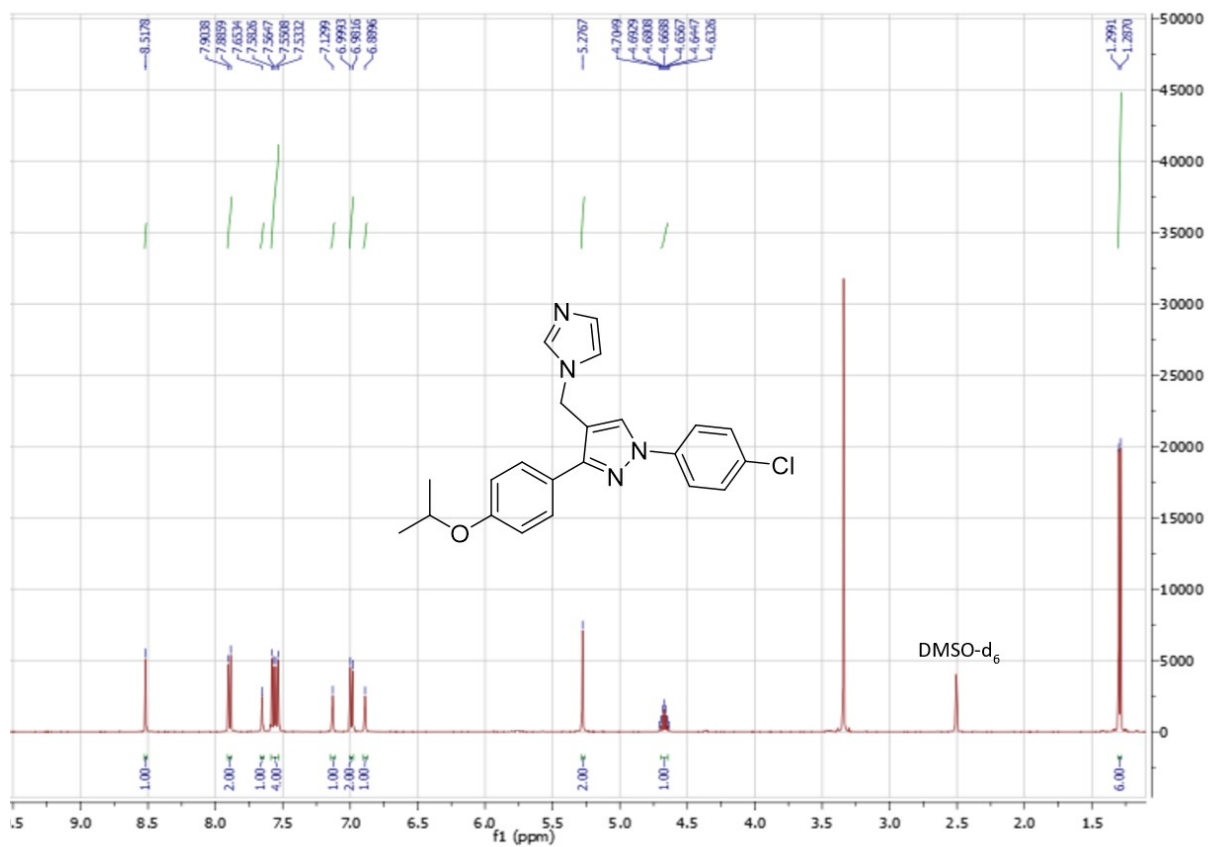

**<sup>13</sup>C NMR spectrum (125.75 MHz, DMSO-d<sub>6</sub>) of 11h:**

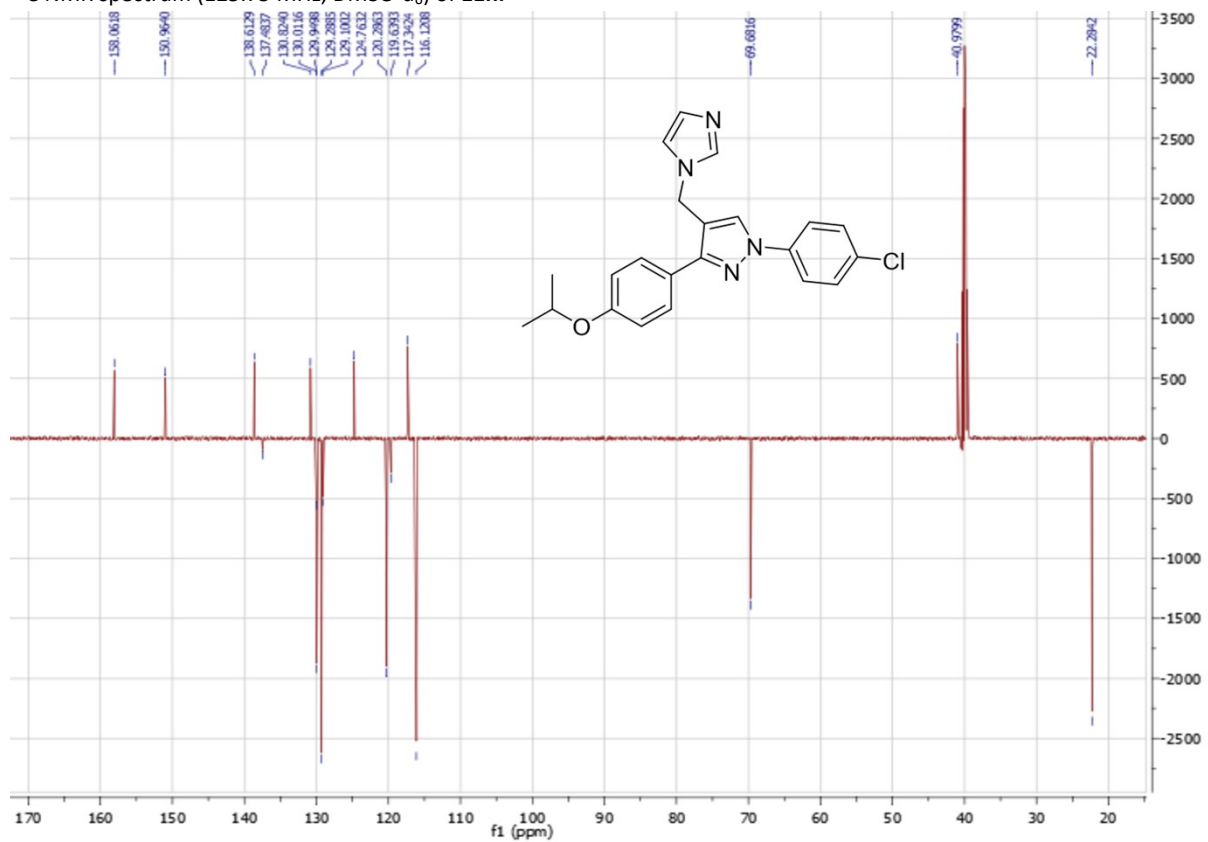

**<sup>1</sup>H NMR spectrum (500 MHz, DMSO-d<sub>6</sub>) of 12a:**

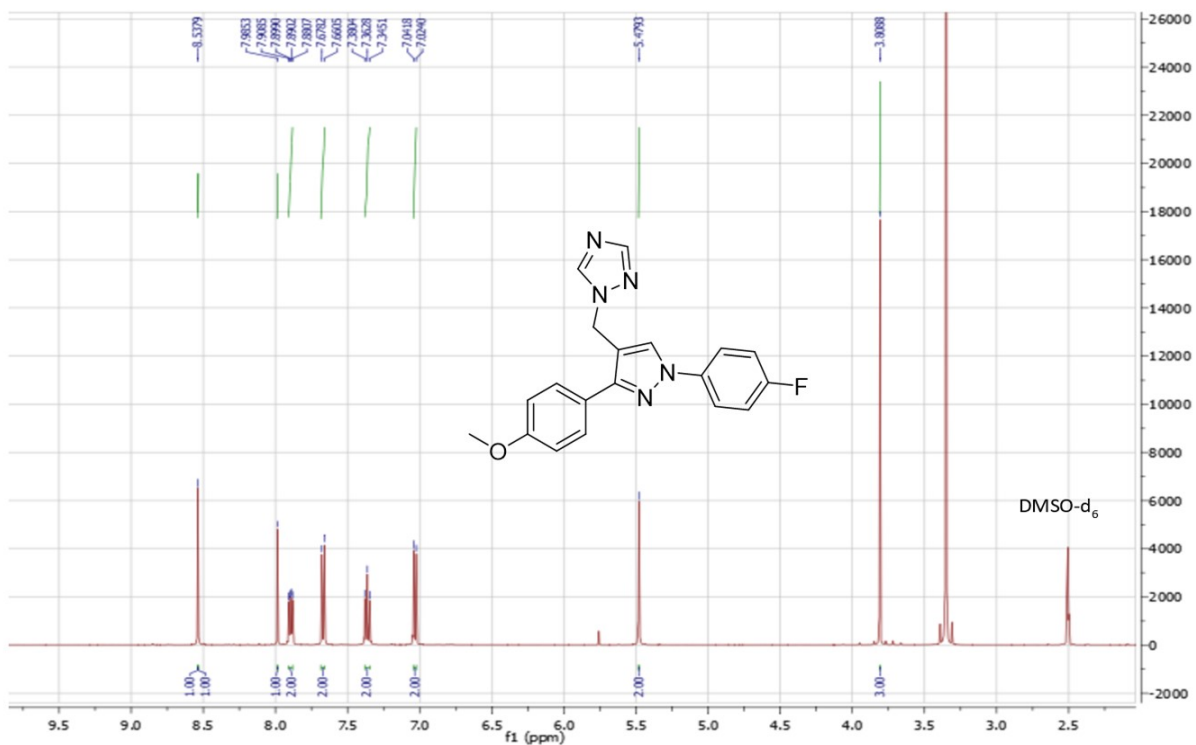

<sup>13</sup>C NMR spectrum (125.75 MHz, DMSO-d<sub>6</sub>) of **12a**:

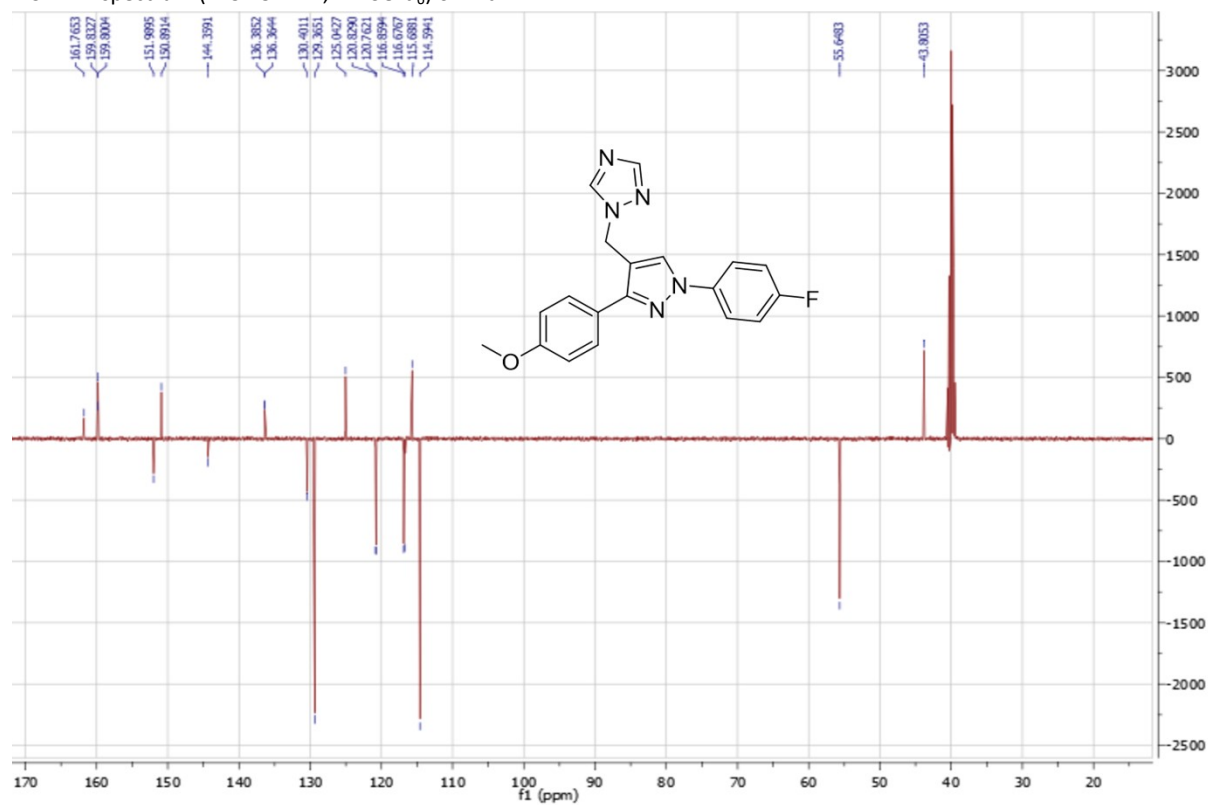

<sup>19</sup>F NMR (470 MHz, DMSO-d<sub>6</sub>) of **12a**:

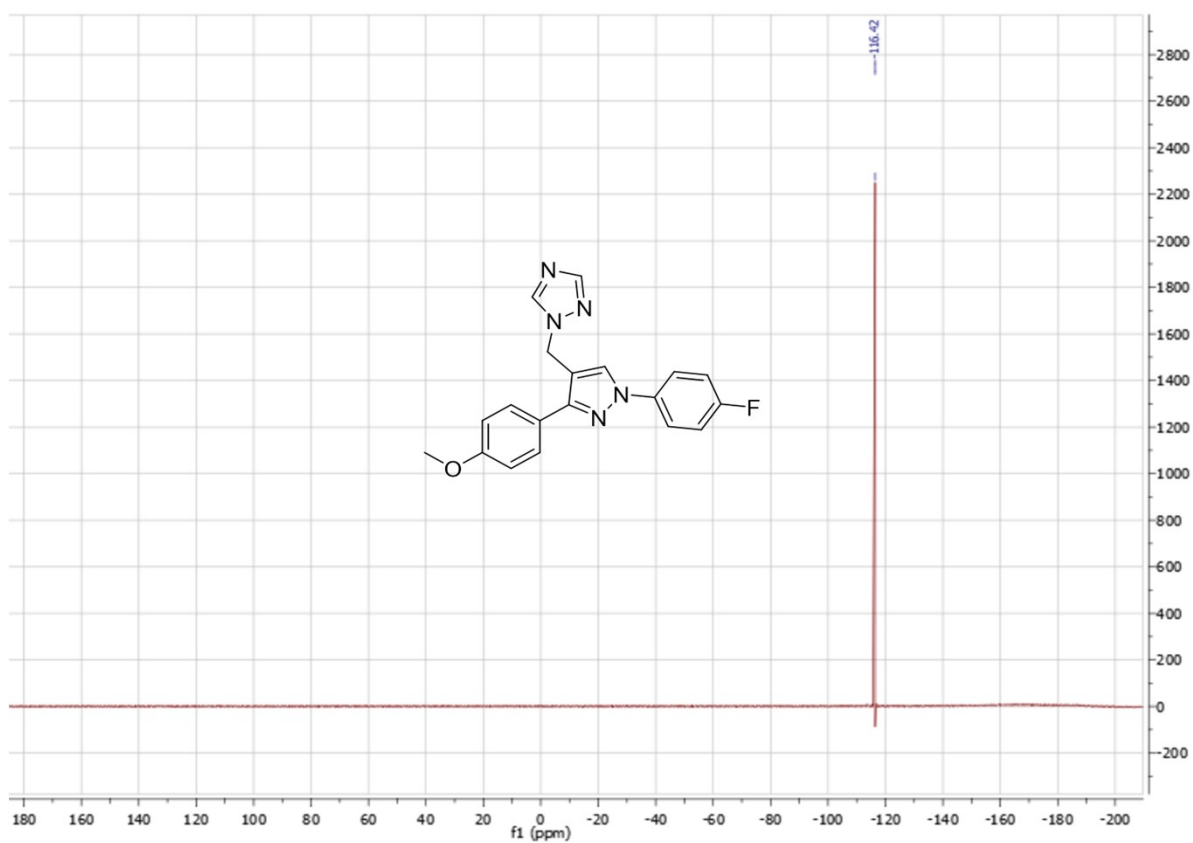

$^1\text{H}$  NMR spectrum (500 MHz, DMSO- $d_6$ ) of **12b**:

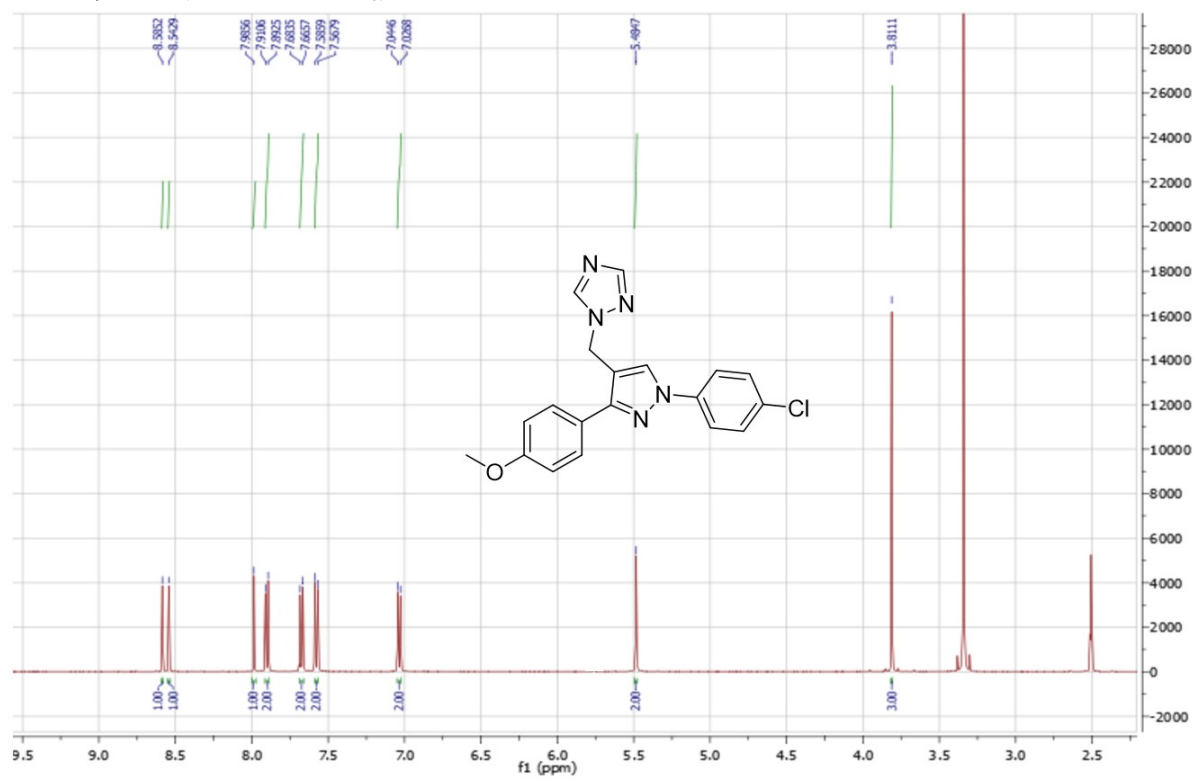

$^{13}\text{C}$  NMR spectrum (125.75 MHz, DMSO- $d_6$ ) of **12b**:

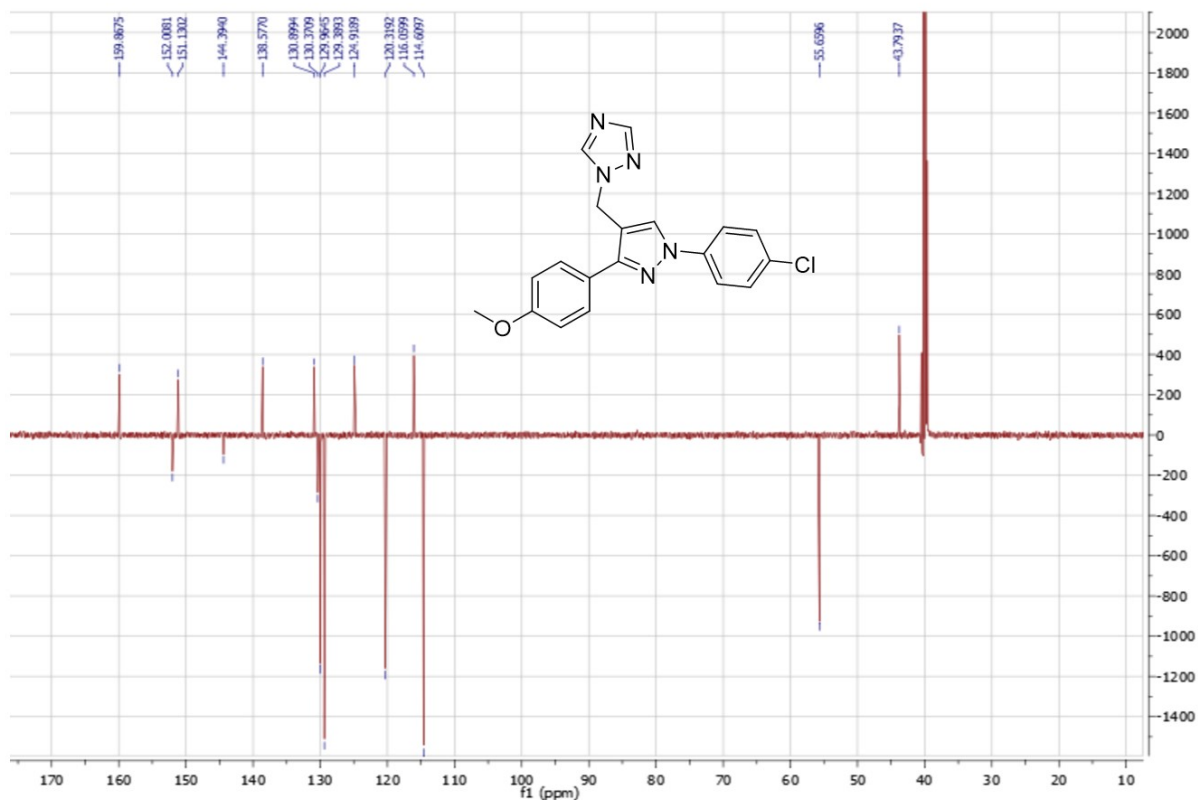

**<sup>1</sup>H NMR spectrum (500 MHz, DMSO-d<sub>6</sub>) of 12c:**

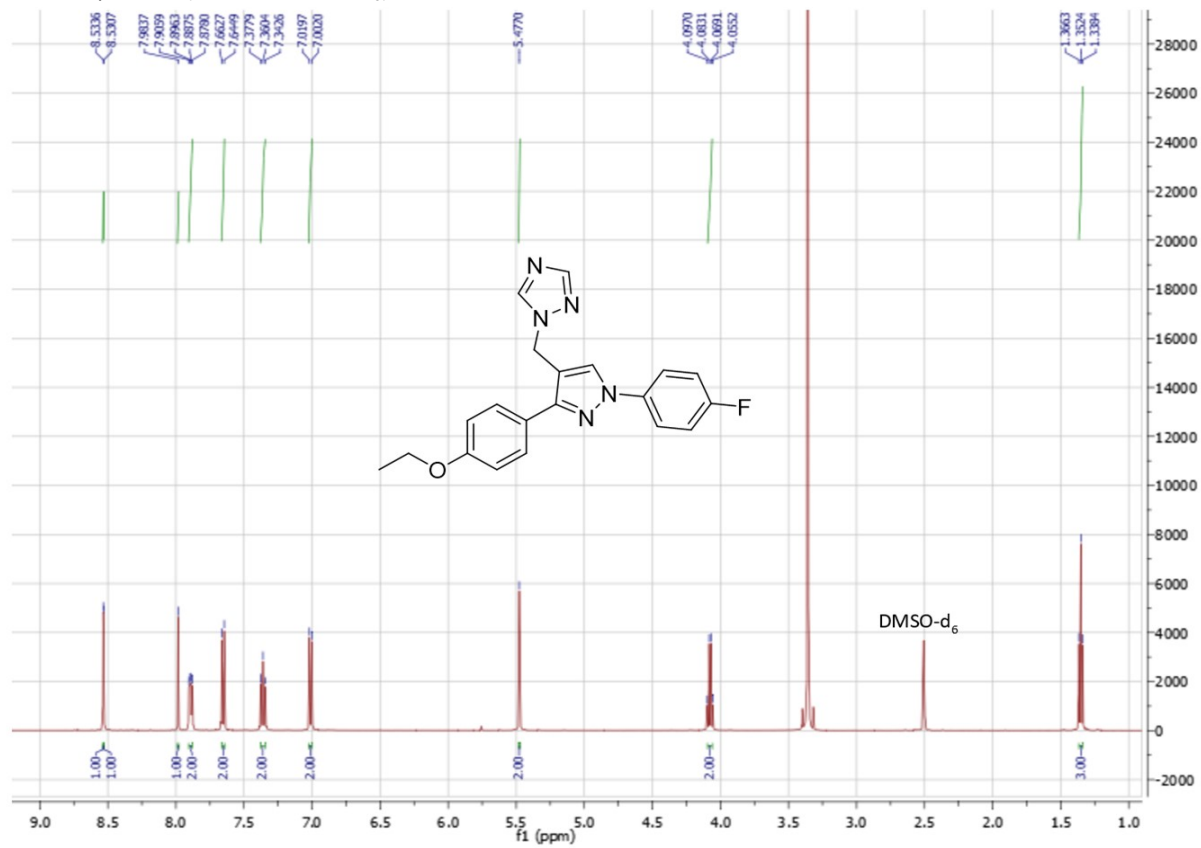

**<sup>13</sup>C NMR spectrum (125.75 MHz, DMSO-d<sub>6</sub>) of 12c:**

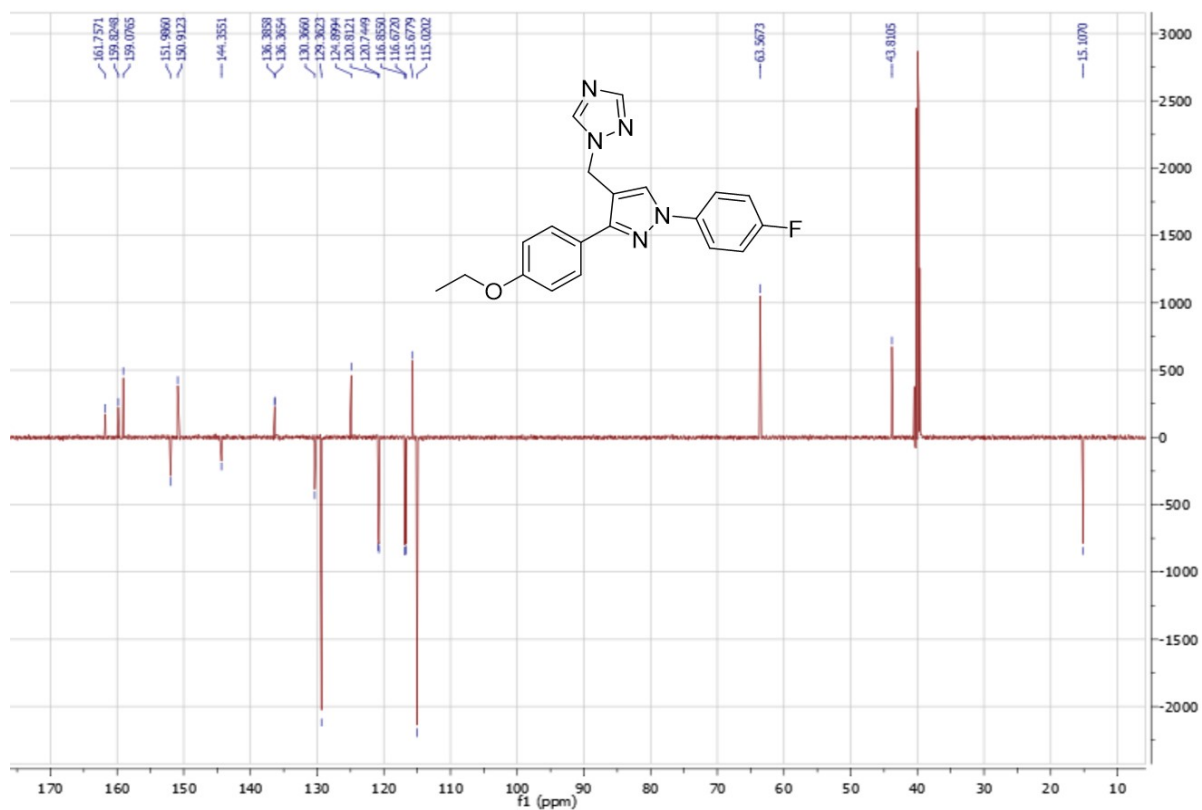

<sup>19</sup>F NMR (470 MHz, DMSO-d<sub>6</sub>) of 12c:

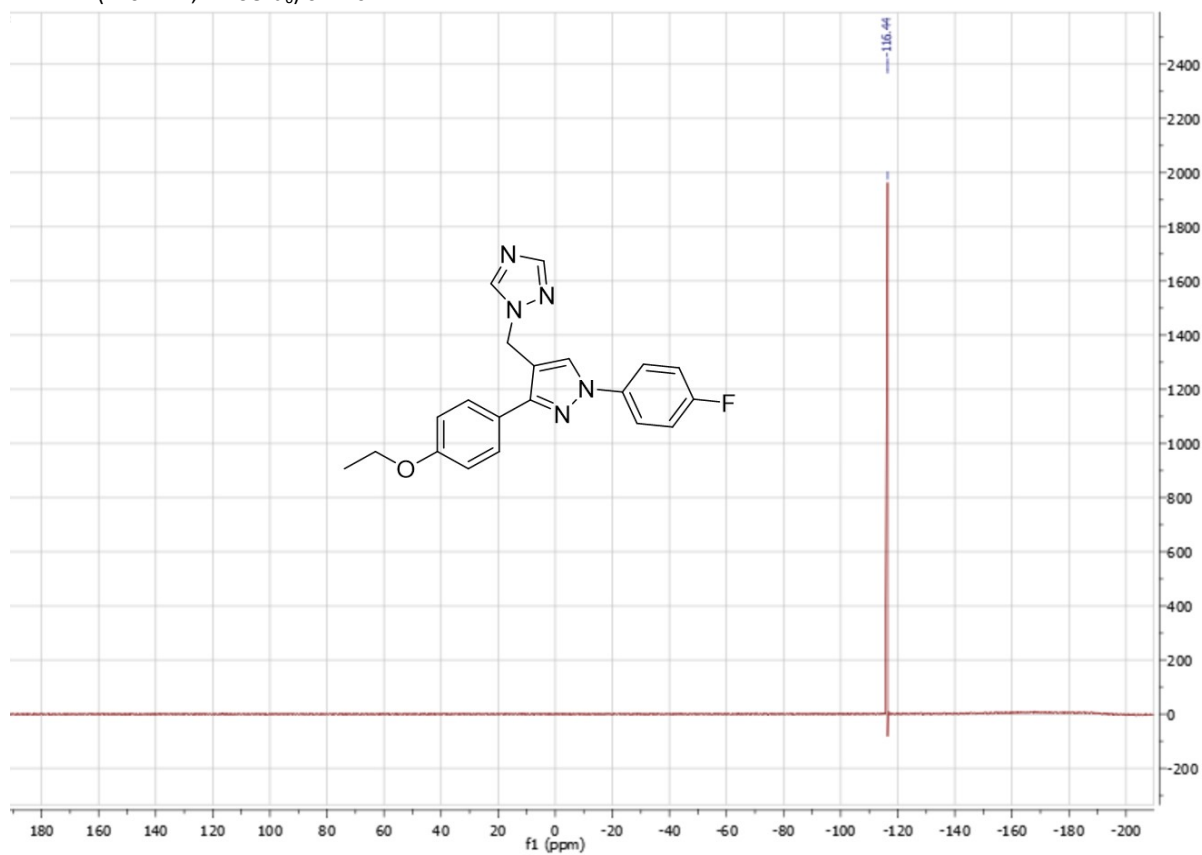

<sup>1</sup>H NMR spectrum (500 MHz, DMSO-d<sub>6</sub>) of 12d:

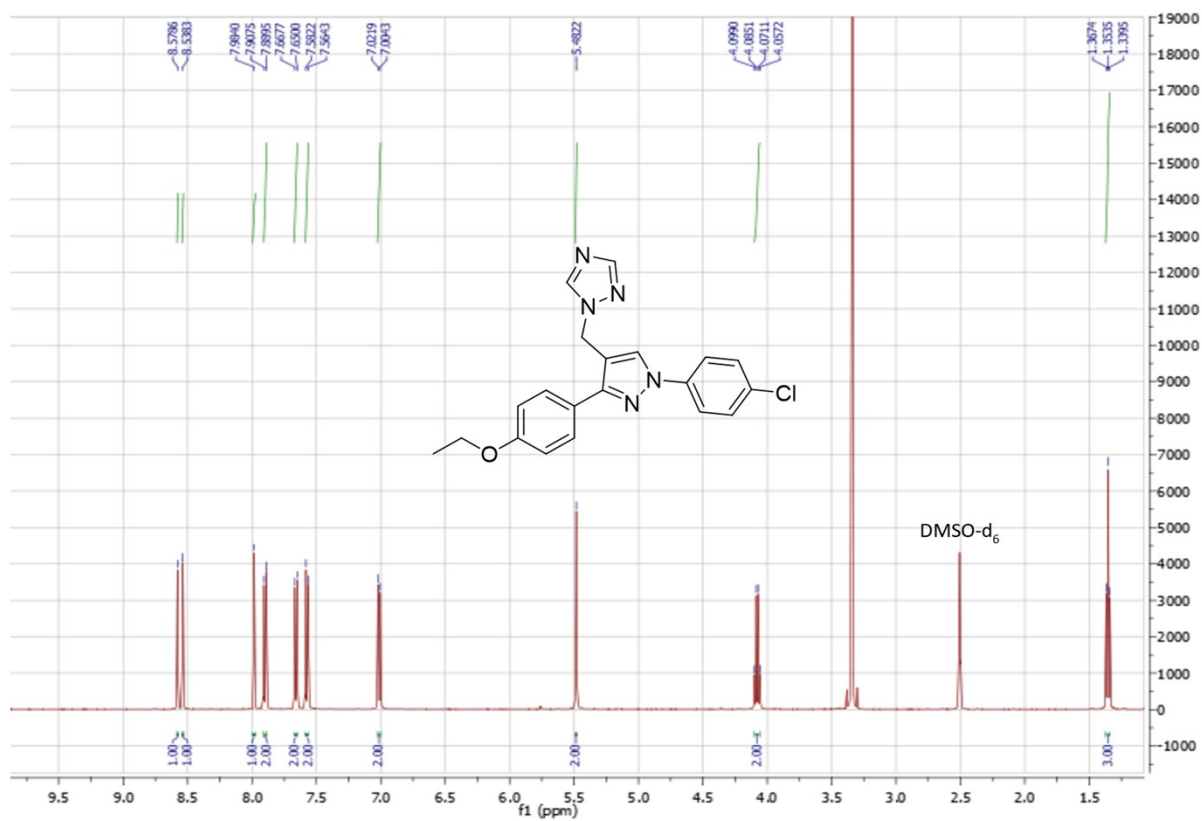

**<sup>13</sup>C NMR spectrum (125.75 MHz, DMSO-d<sub>6</sub>) of 12d:**

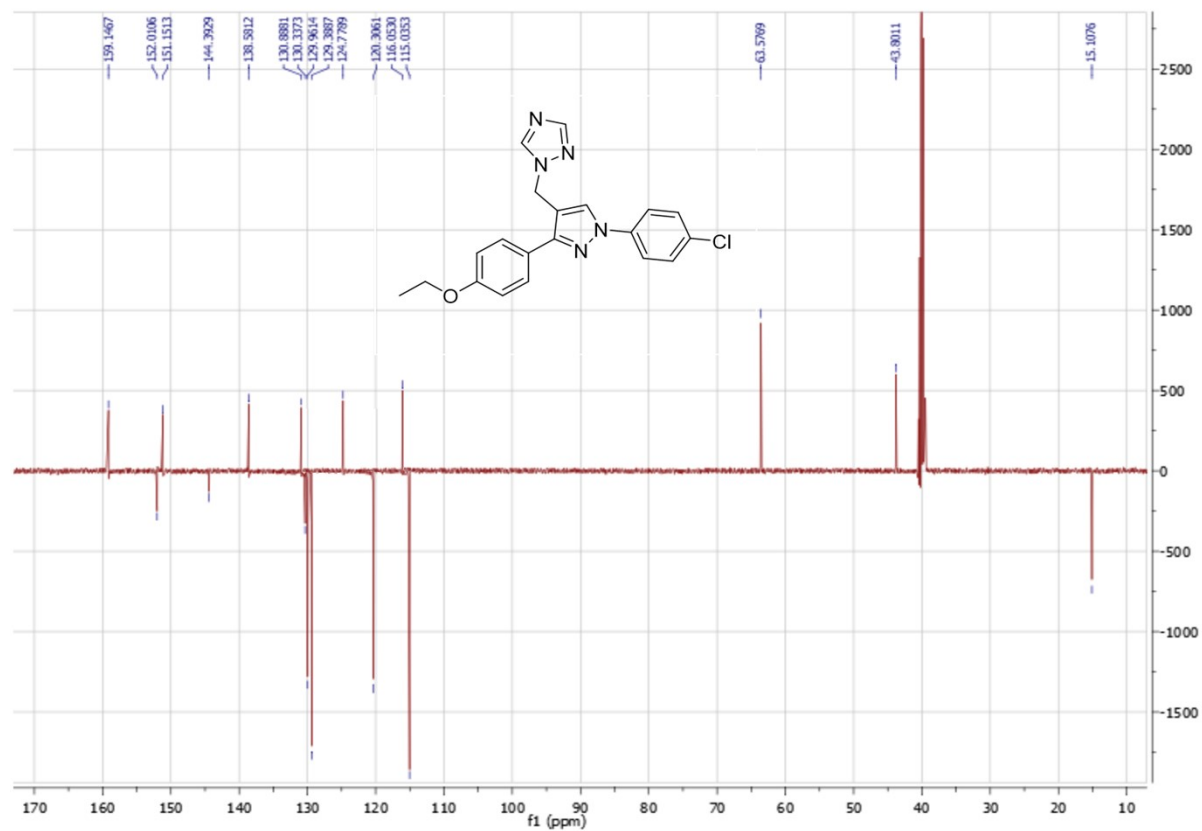

**<sup>1</sup>H NMR spectrum (500 MHz, DMSO-d<sub>6</sub>) of 12e:**

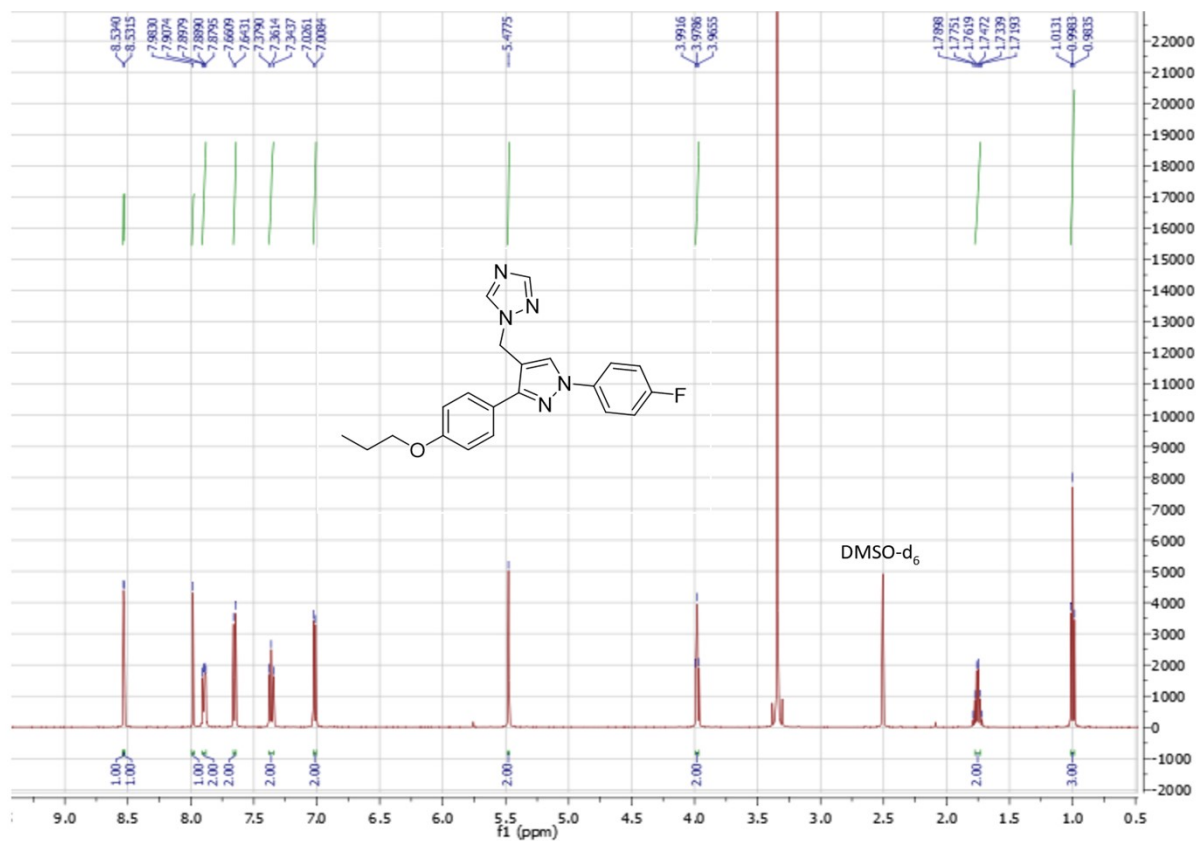

<sup>13</sup>C NMR spectrum (125.75 MHz, DMSO-d<sub>6</sub>) of 12e:

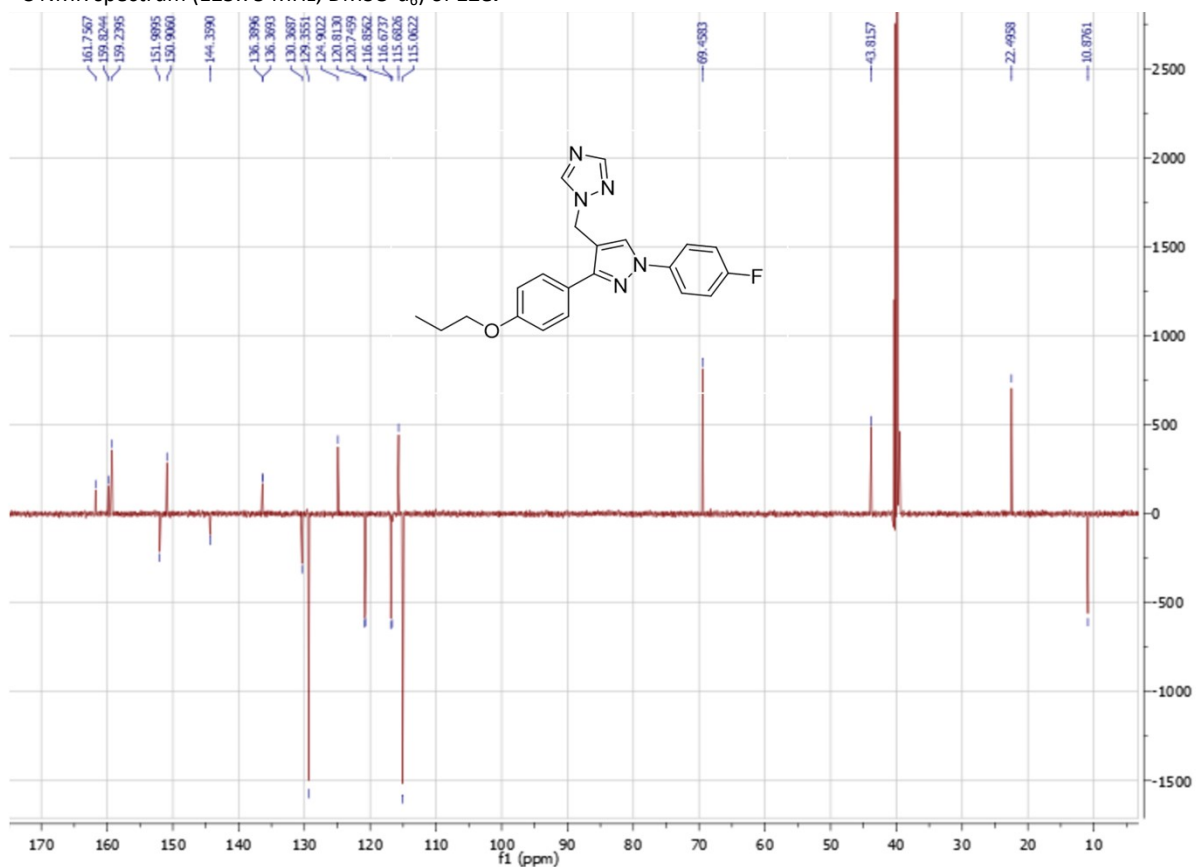

<sup>19</sup>F NMR (470 MHz, DMSO-d<sub>6</sub>) of 12e:

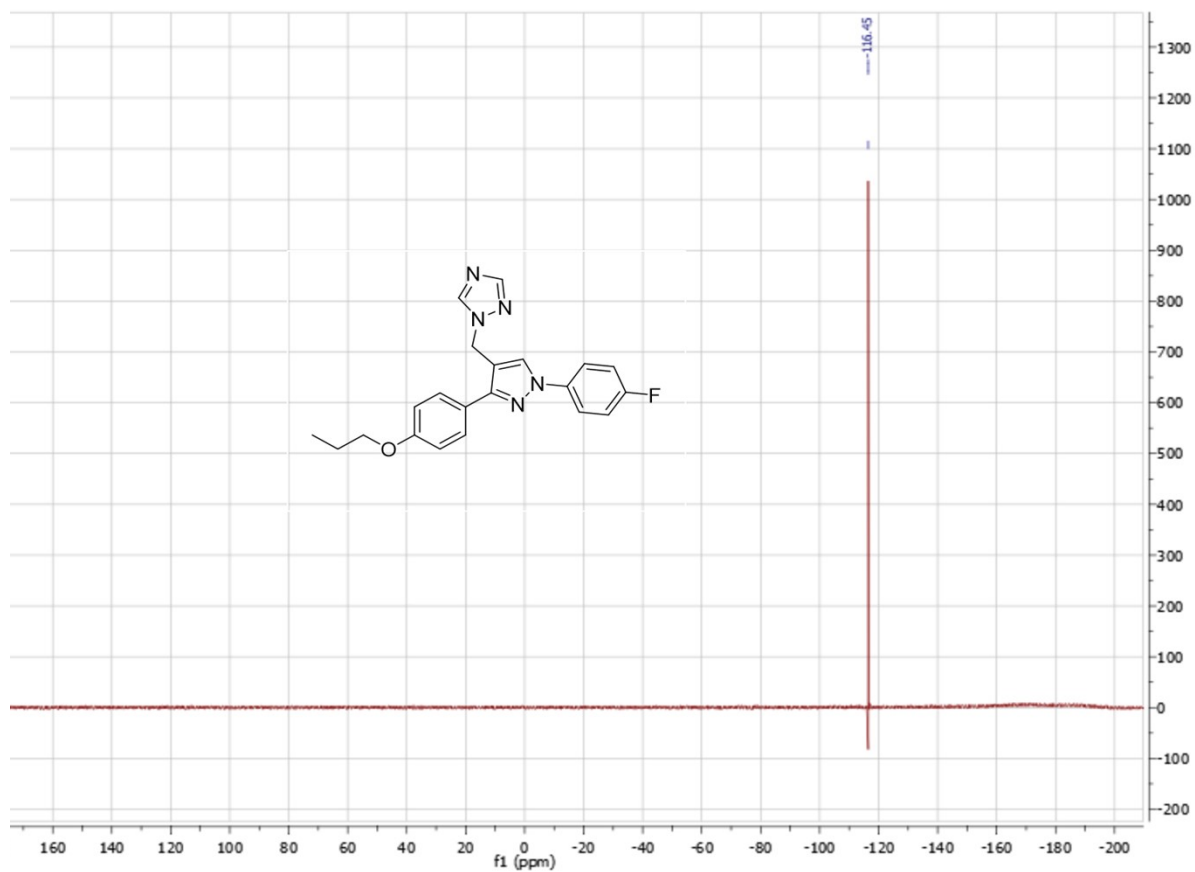

<sup>1</sup>H NMR spectrum (500 MHz, DMSO-d<sub>6</sub>) of **12f**:

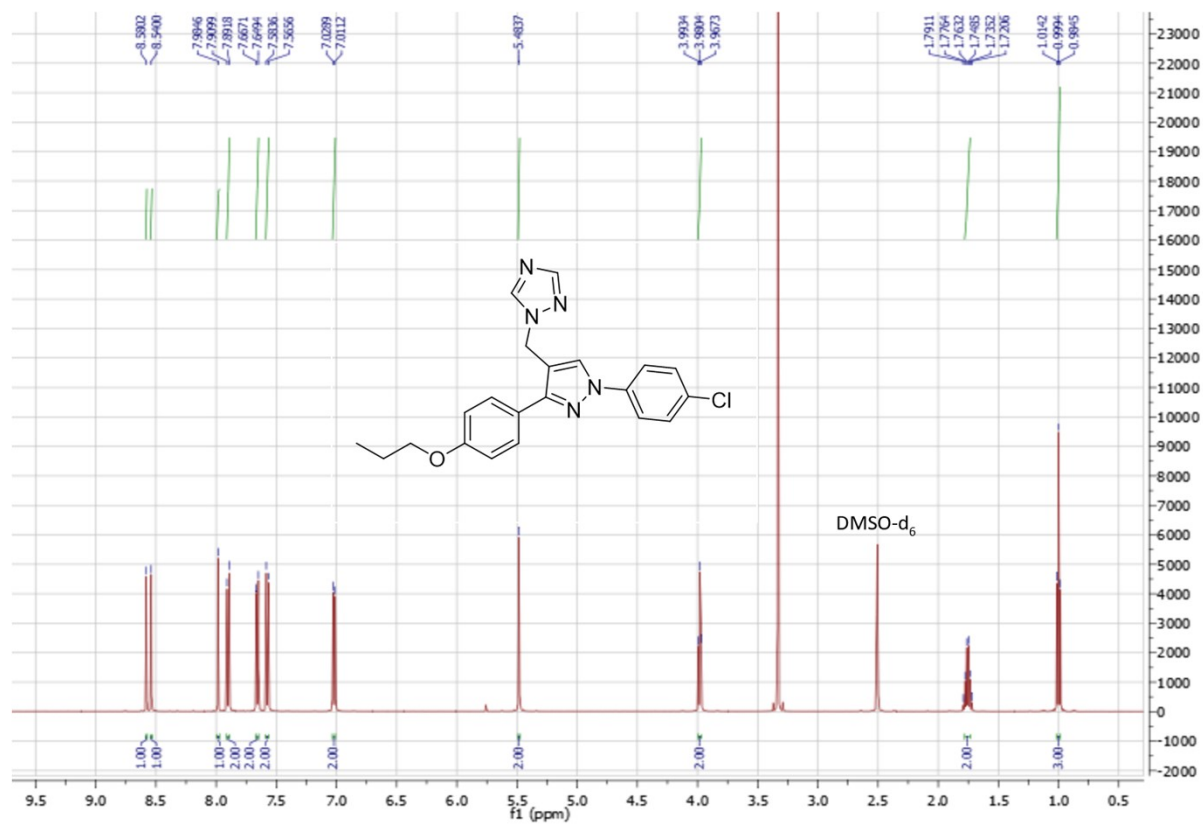

<sup>13</sup>C NMR spectrum (125.75 MHz, DMSO-d<sub>6</sub>) of **12f**:



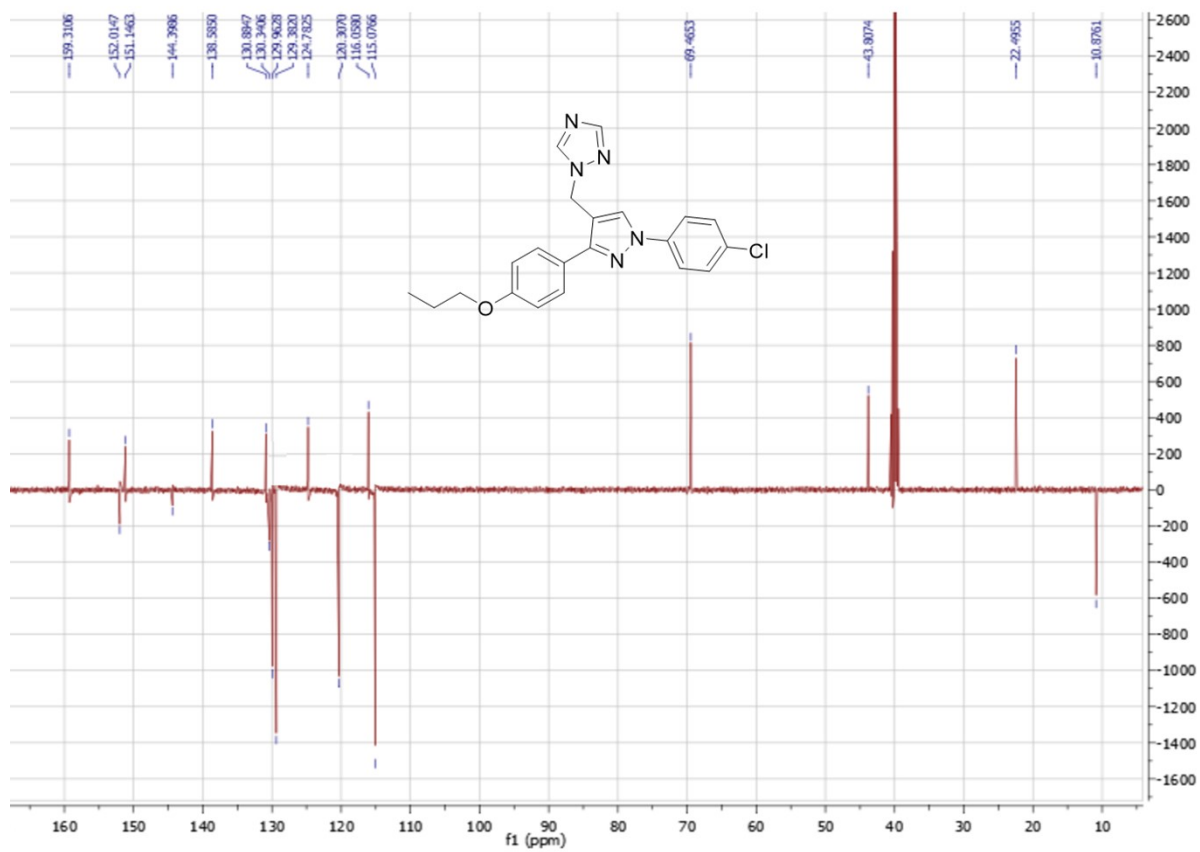

<sup>1</sup>H NMR spectrum (500 MHz, DMSO-d<sub>6</sub>) of **12g**:

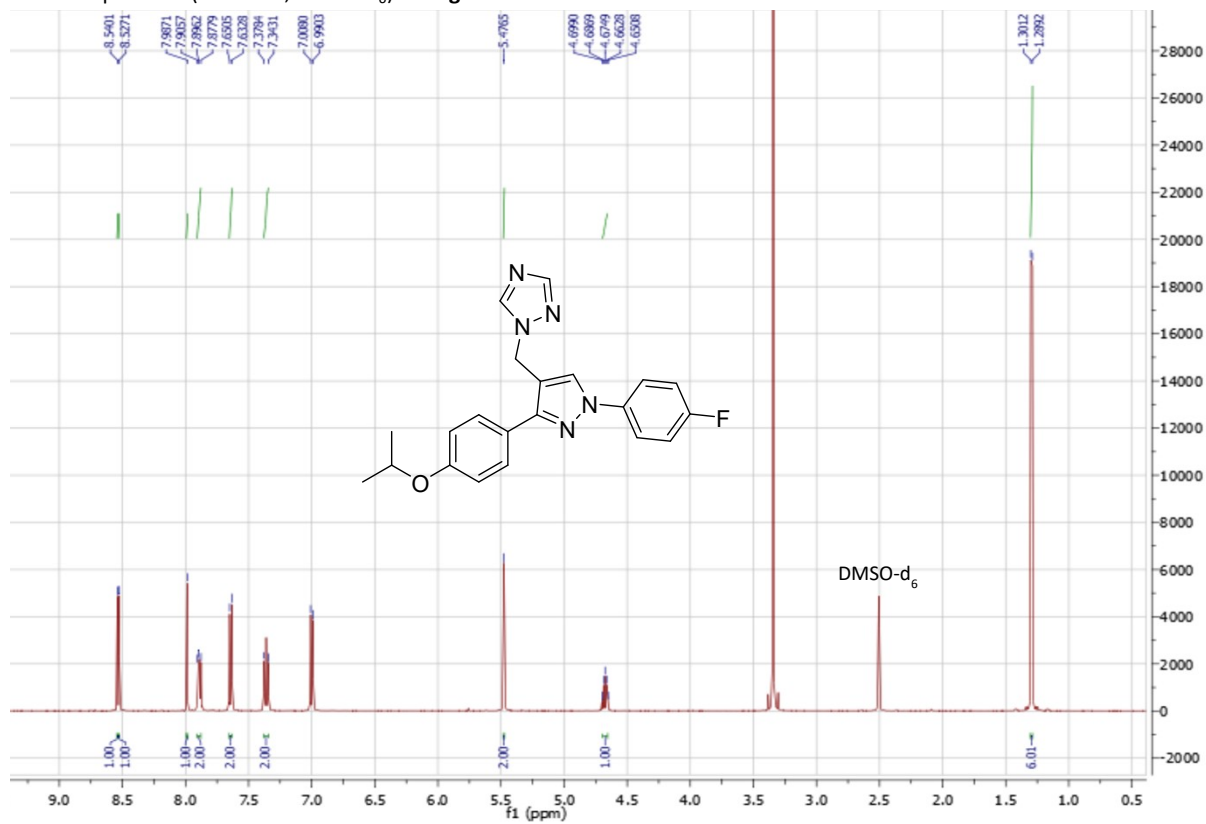

<sup>13</sup>C NMR spectrum (125.75 MHz, DMSO-d<sub>6</sub>) of **12g**:

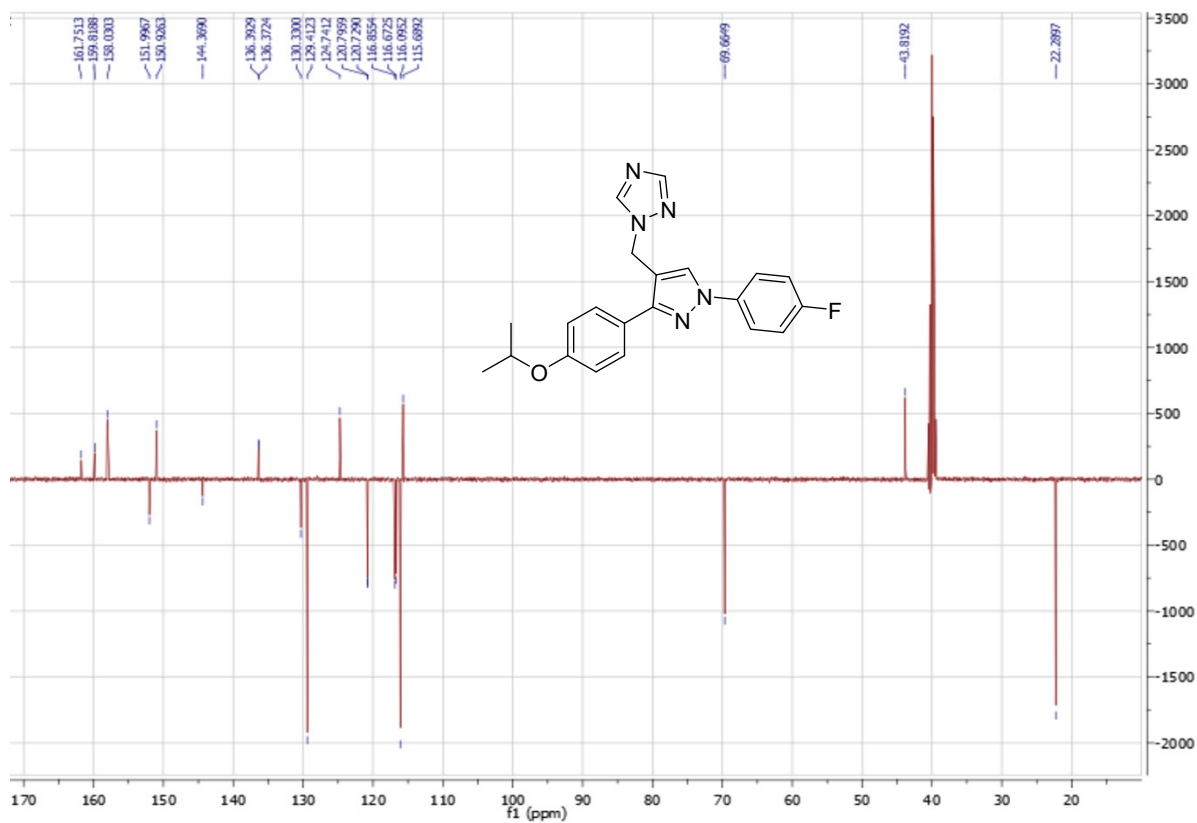

<sup>19</sup>F NMR (470 MHz, DMSO-d<sub>6</sub>) of **12g**:

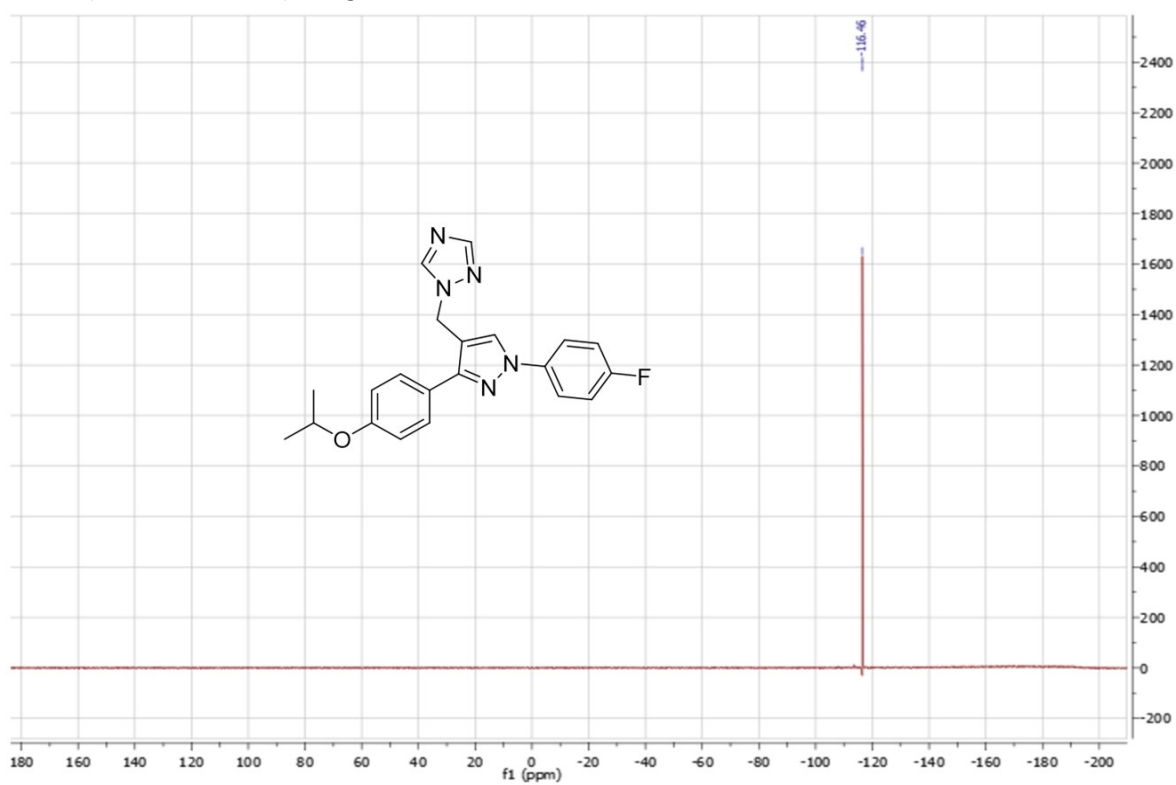

<sup>1</sup>H NMR spectrum (500 MHz, DMSO-d<sub>6</sub>) of **12h**:

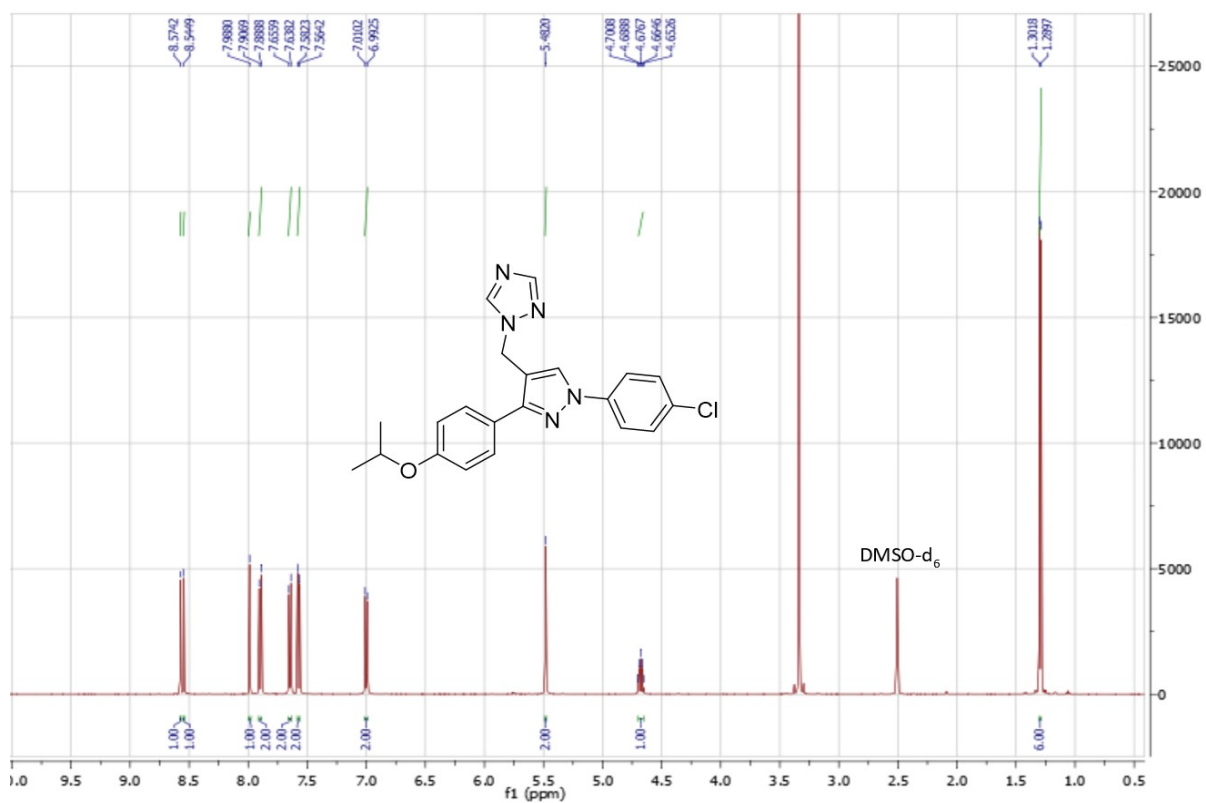

**<sup>13</sup>C NMR spectrum (125.75 MHz, DMSO-d<sub>6</sub>) of 12h:**

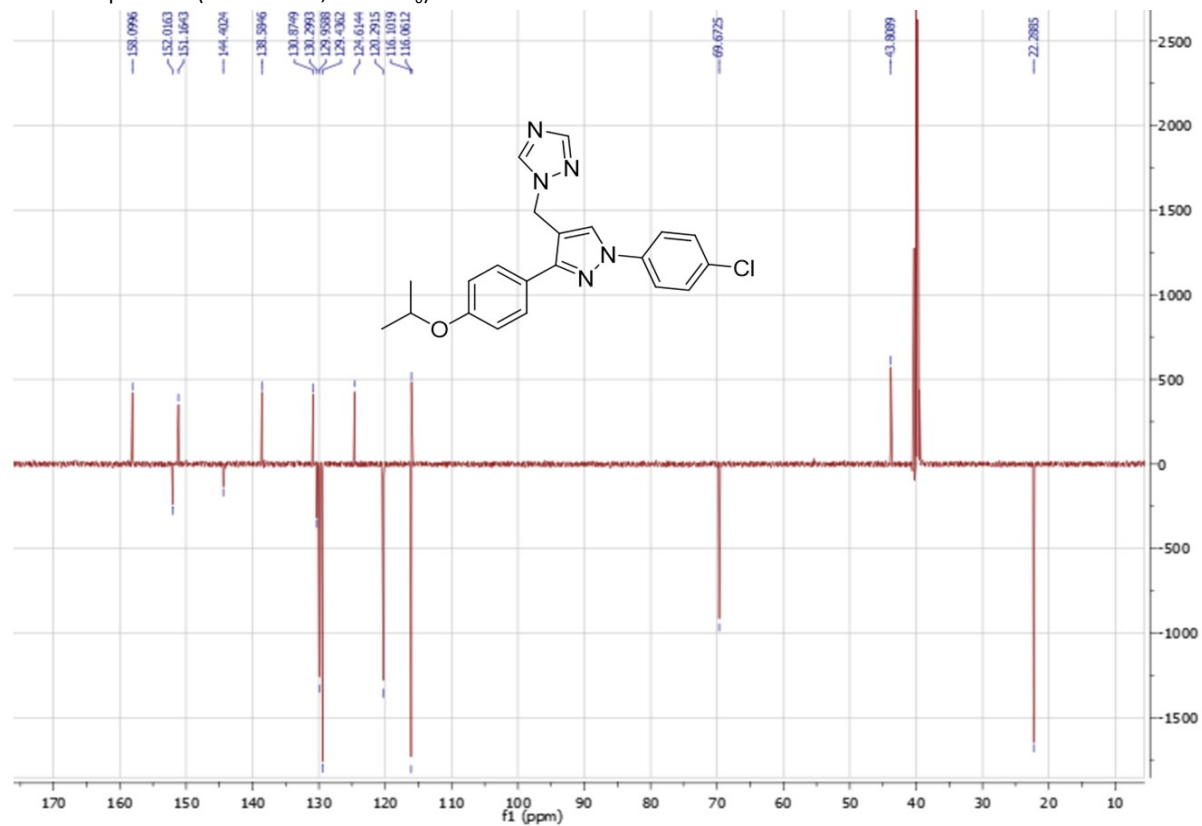

|     |     |     |     |
|-----|-----|-----|-----|
| 11a | 11c | 11d | 11e |
|-----|-----|-----|-----|

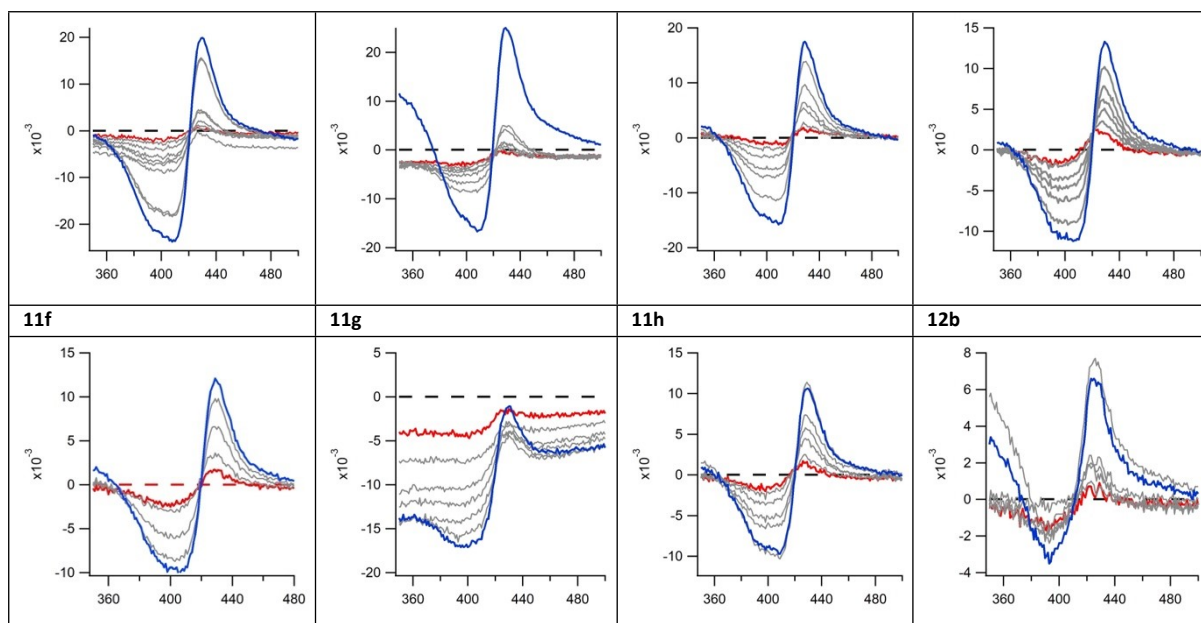

**Figure S1.** Binding difference spectra of pyrazole derivatives **11a**, **11c-11h** and **12b**

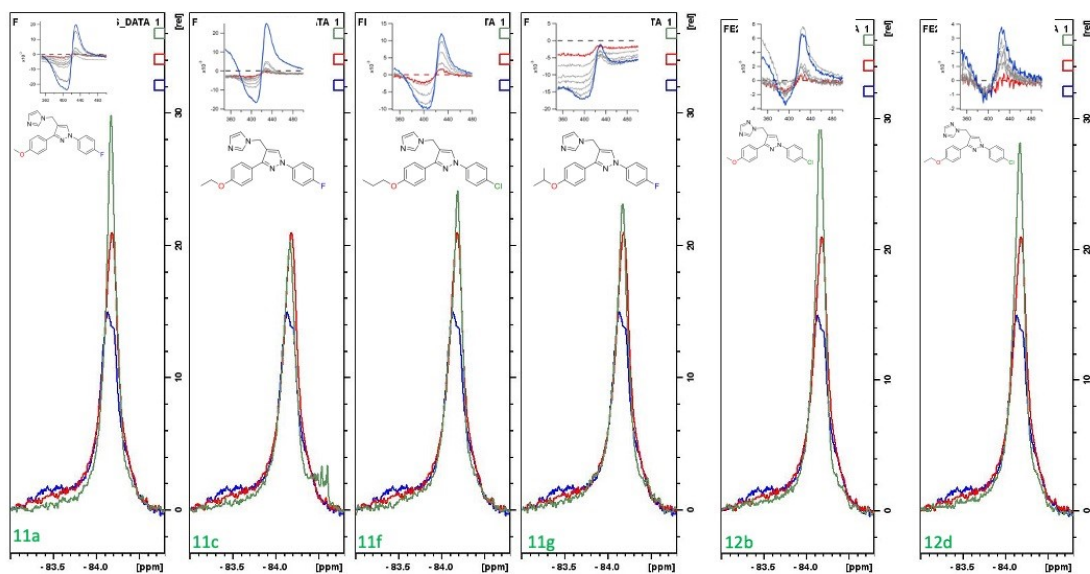

**Figure S2.**  $^{19}\text{F}$  NMR spectra of BTFA-labelled CYP121\_S171C (blue) alone, with cYY bound (red) and with exemplar pyrazole ligands (green)

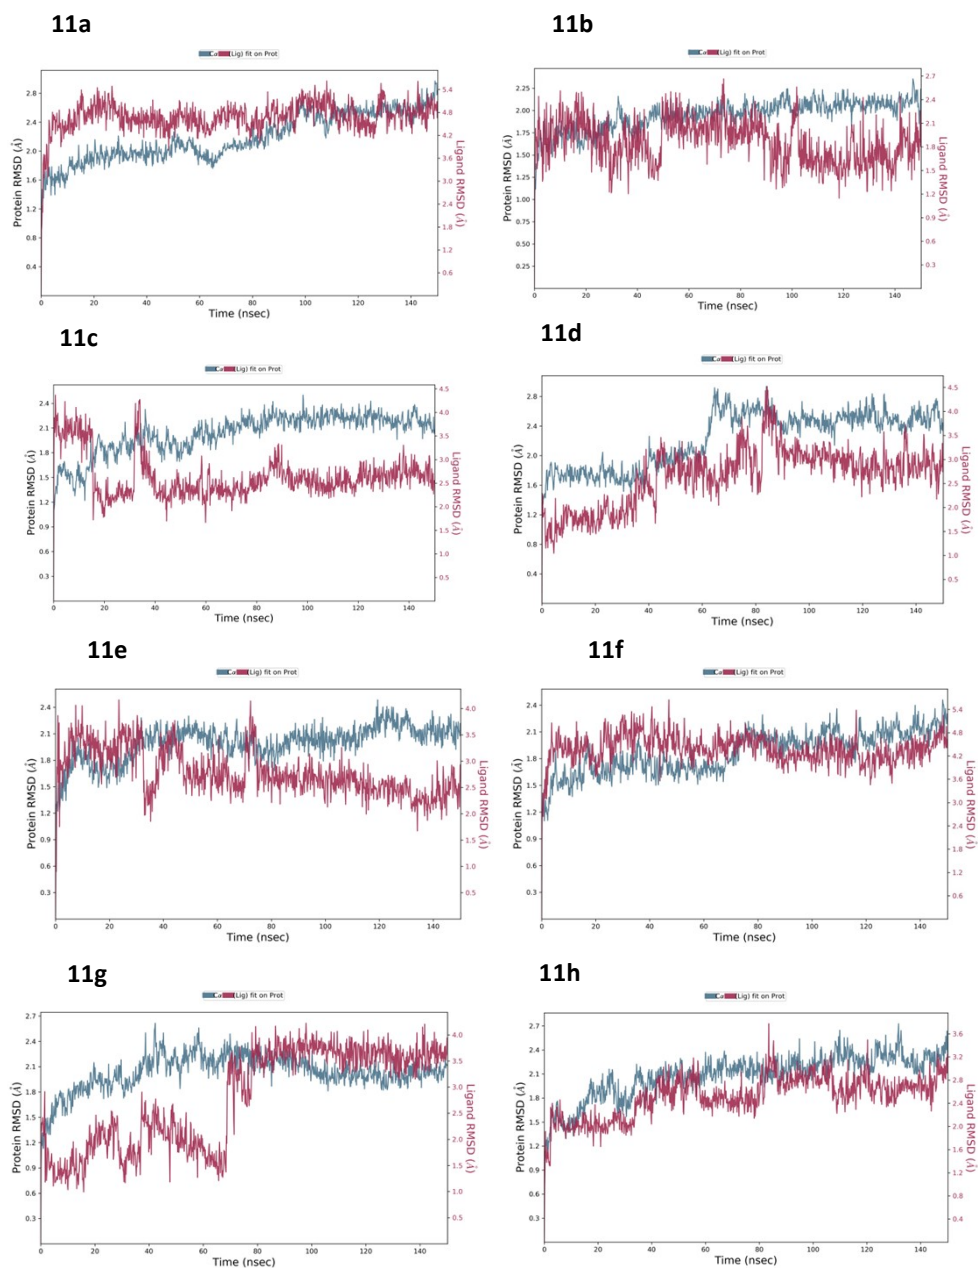

**Figure S3.** Ligand-protein complex stability through protein-ligand RMSD over 150 ns MD simulation for compounds **11**. Ligand RMSD in red and protein RMSD in blue.

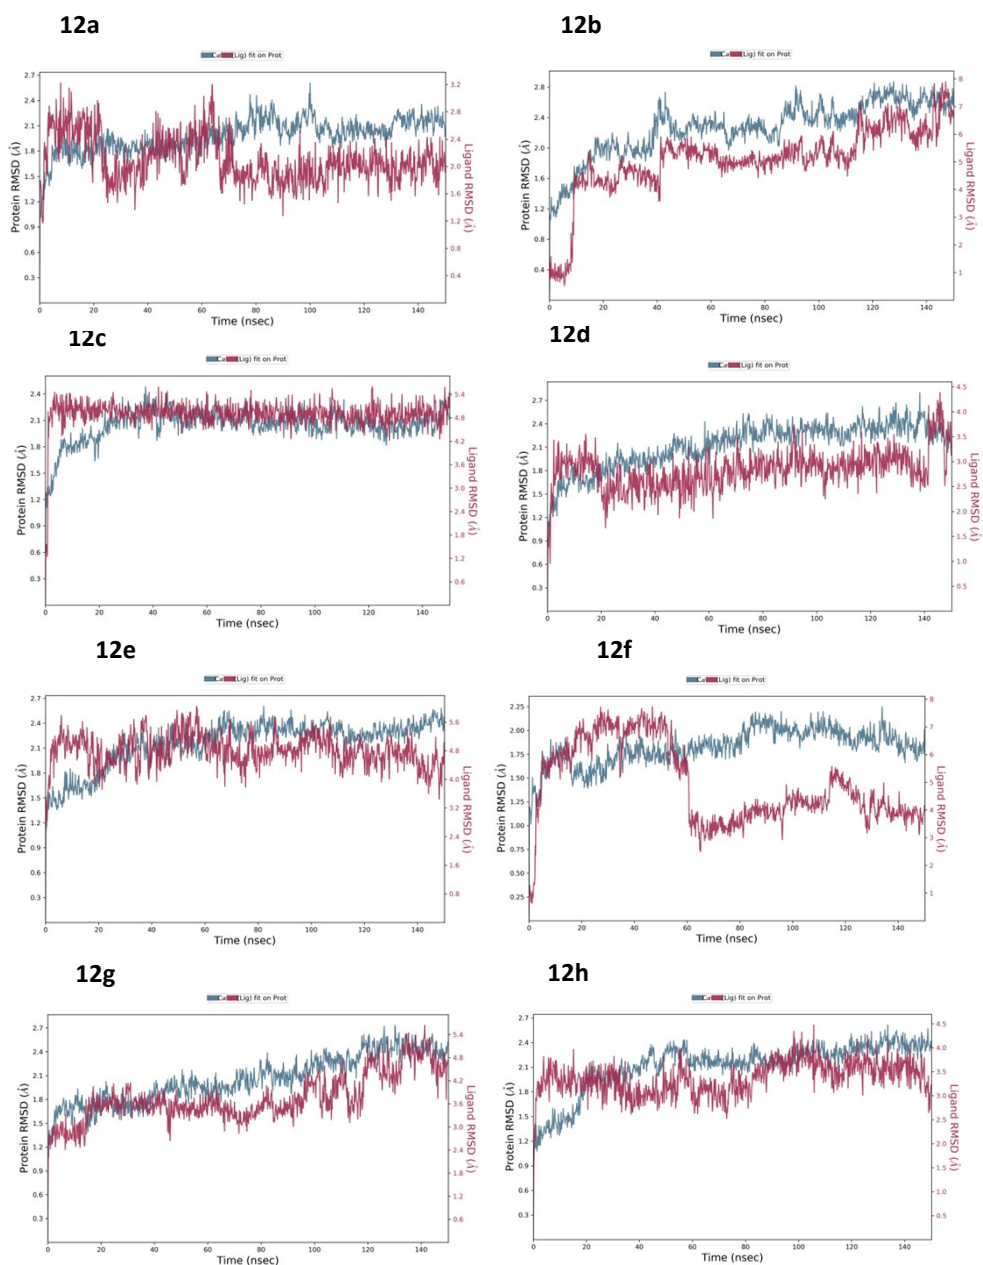

**Figure S4.** Ligand-protein complex stability through protein-ligand RMSD over 150 ns MD simulation for compounds **12**. Ligand RMSD in red and protein RMSD in blue.
